# Supplementary material for: Using primary care data to assess comparative effectiveness and safety of apixaban and rivaroxaban in patients with nonvalvular atrial fibrillation in the UK: an observational cohort study
Source: HighWire-hosted journal article supplement (doi:10.1136/bmjopen-2022-064662), 2022-10-01

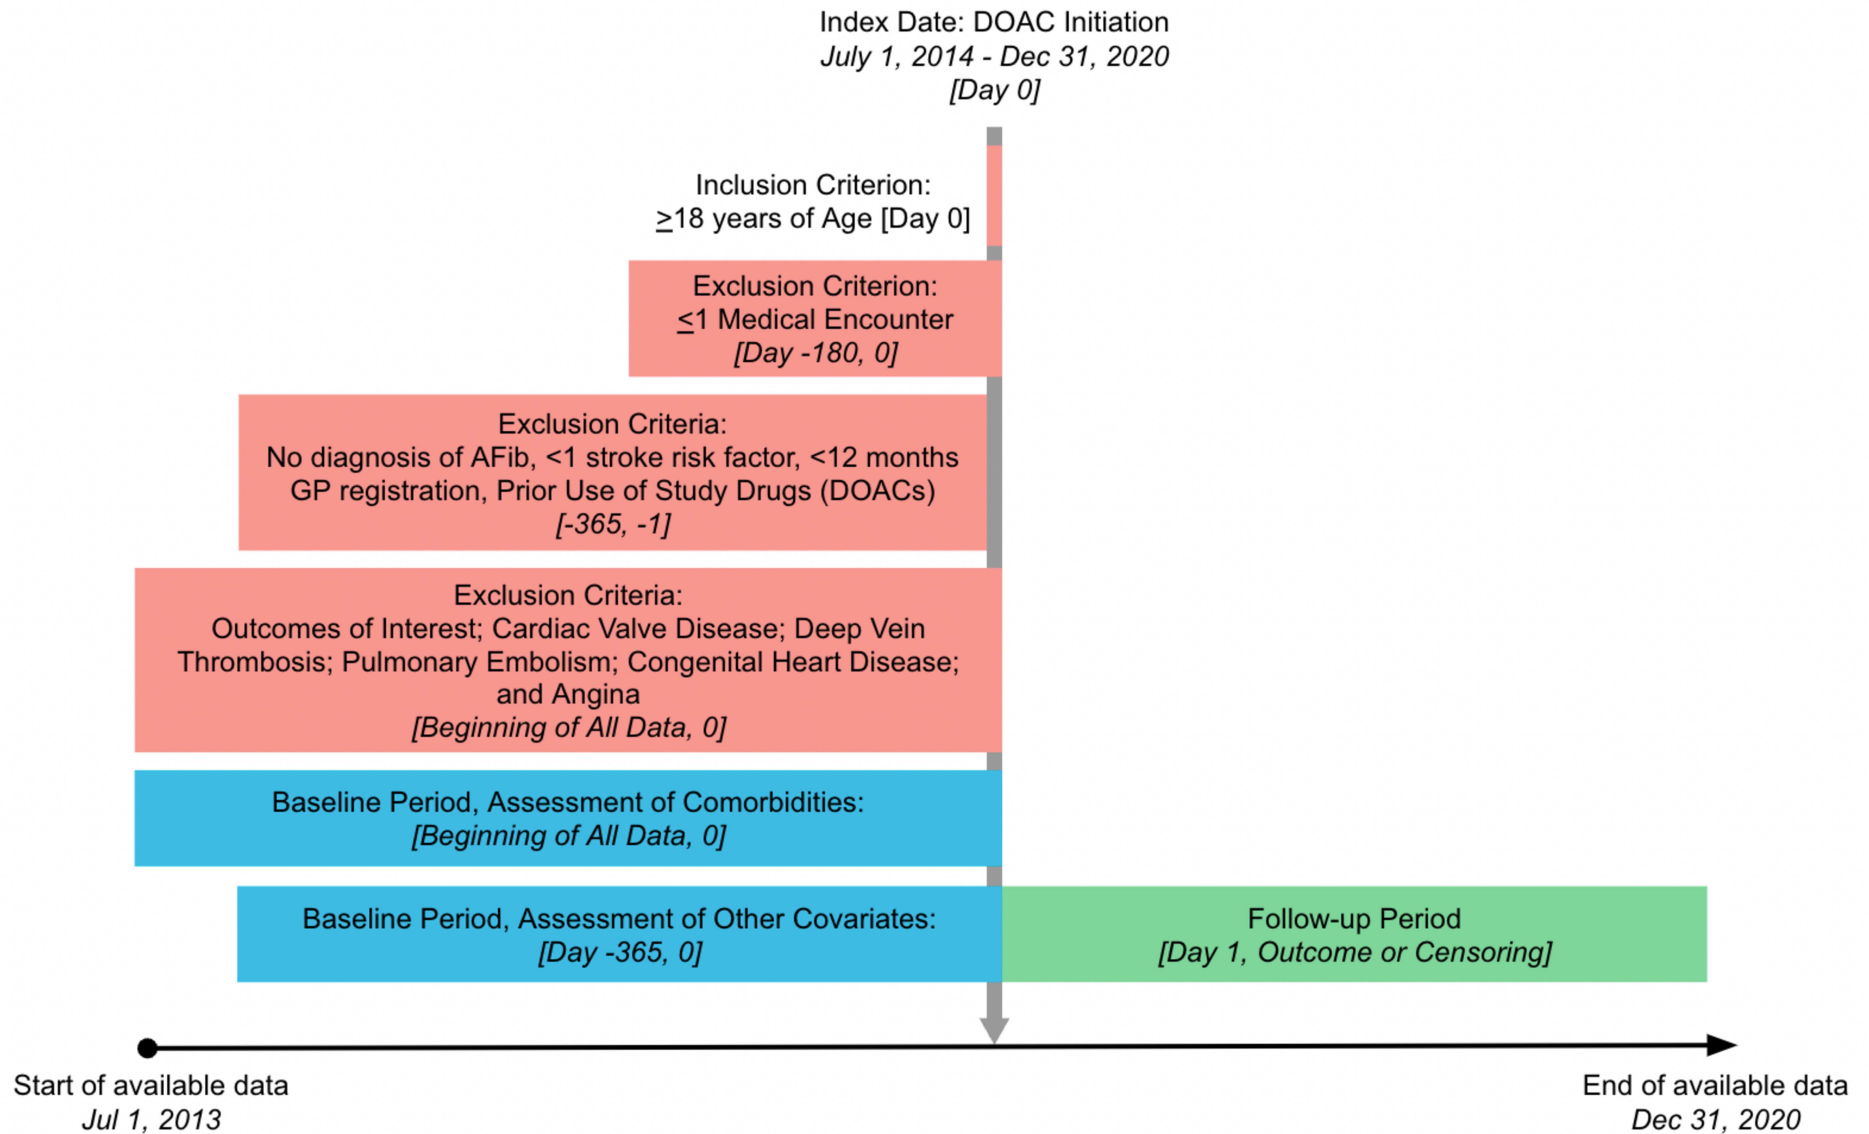

Supplement: bmjopen-2022-064662supp001_data_supplement.pdf [file bmjopen-2022-064662supp001_data_supplement.pdf]
