# Supplementary material for: Using primary care data to assess comparative effectiveness and safety of apixaban and rivaroxaban in patients with nonvalvular atrial fibrillation in the UK: an observational cohort study
Source: HighWire-hosted journal article supplement (doi:10.1136/bmjopen-2022-064662), 2022-10-01
Supplement: bmjopen-2022-064662supp003_data_supplement.pdf [file bmjopen-2022-064662supp003_data_supplement.pdf]

## Aetion Measure Appendix

### Administrative Information (STaRT-RWE Table 1)

|                            |                                                                                                                                                                                     |  |
|----------------------------|-------------------------------------------------------------------------------------------------------------------------------------------------------------------------------------|--|
| <b>Protocol Title</b>      | UK                                                                                                                                                                                  |  |
| <b>Primary Objective</b>   | Estimate the incidence rates and evaluate the association of nonfatal stroke (ischemic or hemorrhagic) for patients nonvalvular AFib who initiated apixaban compared to rivaroxaban |  |
| <b>Secondary Objective</b> | apixaban compared to edoxaban, dabigatran, and DOAs class                                                                                                                           |  |
| <b>Secondary Objective</b> | transient ischemic attack (TIA), major bleeding events, and major adverse cardiovascular events (MACE) for patients                                                                 |  |

### Registration

| Registration Identifier | Date      | Registration Site |
|-------------------------|-----------|-------------------|
| 45074                   | 1/10/2022 | EU PASS register  |

### Version

| Version Number | Version Date |
|----------------|--------------|
| V1             | 10/22/21     |

### Protocol Contributors

| Name                         | Role                                     | Affiliation                |
|------------------------------|------------------------------------------|----------------------------|
| Nicolle Gatto, PhD, MPH      | Senior Vice President                    | Aetion, Inc., New York, NY |
| Pall Jonnson, PhD.           | Programme Director - Data                | NICE                       |
| Ayad Ali, PhD, SRPharmS      | Senior Principal Scientist               | Aetion, Inc., New York, NY |
| Mandy Patrick, MS            | Senior Principal Scientist               | Aetion, Inc., New York, NY |
| Ashley Jaksa, MPH            | Scientific Partnerships Lead             | Aetion, Inc., New York, NY |
| Lisa Gibbs, BA               | Scientist                                | Aetion, Inc., New York, NY |
| Seamus Kent, PhD.            | Sr Advisor in Data and Analytics         | NICE                       |
| Shaun Rowark, MSc            | Scientific Advisor in Data and Analytics | NICE                       |
| Stephen Duffield, PhD, MBChB | Senior Analyst                           | NICE                       |

### Funding

| Grant Identifier | Source                                                                               |
|------------------|--------------------------------------------------------------------------------------|
| -                | This research was conducted as part of a Research Collaboration Agreement with NICE. |

### Data Use Agreement (DUA)

| DUA Identifier | Data Provider | Data Provider Contact for DUA |
|----------------|---------------|-------------------------------|
| -              | Cegedim       | Shelley Jessop                |

### Human Subjects/Ethics Approval

observational, non-interventional study does not affect the treatment of the patients. The study is conducted in accordance with ethical principles that are

[This Measure Appendix is based largely on the STaRT-RWF templates proposed by Wang et al., 2020.](#)

**Research Question Overview**

fibrillation (AFib) in the UK. Individual DOAs of interest include apixaban, rivaroxaban, edoxaban, and dabigatran.

**Study Design Diagram (STaRT-RWE Figure 1)**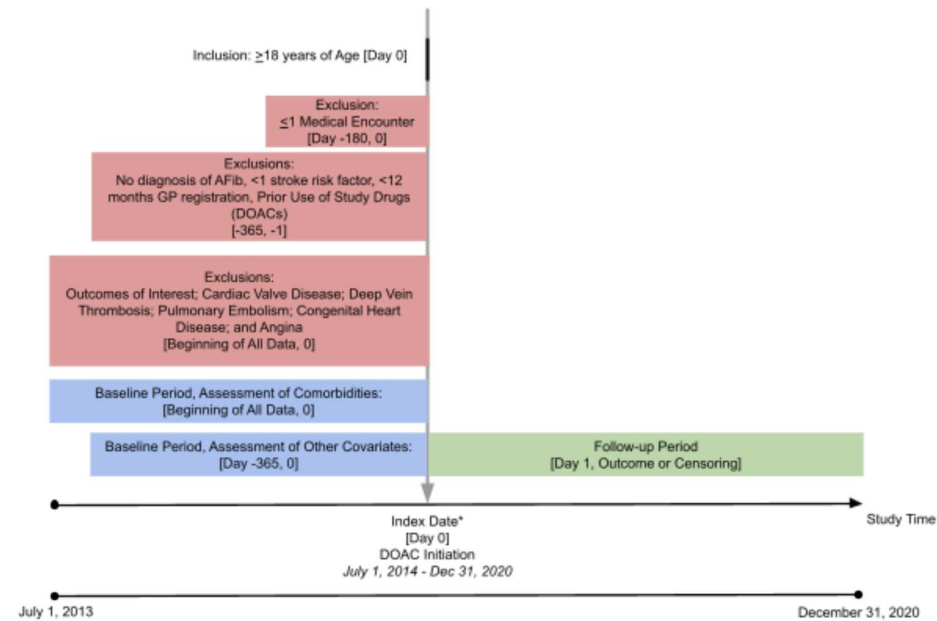

| Measure Appendix Version History (STaRT-RWE Table 2) |              |            |                       |
|------------------------------------------------------|--------------|------------|-----------------------|
| Version Number                                       | Version Date | Change Log | Rationale for Changes |
| 1                                                    | 1/3/2022     | N/A        | N/A                   |
|                                                      |              |            |                       |

| <b>Data Source Details (STaRT-RWE Table 3)</b>                                                                                              |                                                                                                                                                                                               |
|---------------------------------------------------------------------------------------------------------------------------------------------|-----------------------------------------------------------------------------------------------------------------------------------------------------------------------------------------------|
| <i>calendar time range of data available for pre-index assessment windows and post-index follow up (study period). The data source name</i> |                                                                                                                                                                                               |
|                                                                                                                                             | <b>Data Source 1</b>                                                                                                                                                                          |
| <b>Data Source Name</b>                                                                                                                     | The Health Improvement Network (THIN) Database (A priority database from Cegedim)                                                                                                             |
| <b>Study Period</b>                                                                                                                         | July 1, 2013 - December 31, 2020                                                                                                                                                              |
| <b>Eligible Cohort Entry Period</b>                                                                                                         | July 1, 2014 - December 31, 2020                                                                                                                                                              |
| <b>Data Extraction Date / Version</b>                                                                                                       | July 30, 2021                                                                                                                                                                                 |
| <b>Data Sampling / Extraction Criteria</b>                                                                                                  | As part of the study application and data access process, Cegedim applied limited inclusion/exclusion criteria to extract the data set used in the analysis. See Cohort tab for more details. |
| <b>Type(s) of Data</b>                                                                                                                      | EHR                                                                                                                                                                                           |
| <b>Data Linkage</b>                                                                                                                         | N/A                                                                                                                                                                                           |
| <b>Data Conversion</b>                                                                                                                      | N/A                                                                                                                                                                                           |
| <b>Software to Create Study Population</b>                                                                                                  | Action Evidence Platform                                                                                                                                                                      |

## Index

| Study Population            |                                                        |                               | Implementation                                                       |                   |               |                    |                        |                  |               |                                                             |               |                        |                                   |
|-----------------------------|--------------------------------------------------------|-------------------------------|----------------------------------------------------------------------|-------------------|---------------|--------------------|------------------------|------------------|---------------|-------------------------------------------------------------|---------------|------------------------|-----------------------------------|
| Abbreviation                | Name                                                   | Corresponding Study Objective | Index Date Description                                               | Number of Entries | Type of Entry | Washout Window     | Care Settings (Events) | Code Type        | Code Position | Incident With Respect to...                                 | Pre-Specified | Varied for Sensitivity | Source                            |
| Apixaban                    | Incident Users of apixaban                             | Primary                       | initiation of apixaban during July 1, 2014 through December 31, 2020 | Single            | Incident      | Day -365 to Day -1 | Perscriptions          | Product ATC code | N/A           | Incident users with respect to exposure and all other DOACs | Yes           | No                     | ATC index; reviewed by Pharmacist |
| Rivaroxaban                 | Incident users of rivaroxaban                          | Primary                       | initiation of apixaban during July 1, 2014 through December 31, 2020 | Single            | Incident      | Day -365 to Day -1 | Perscriptions          | Product ATC code | N/A           | Incident users with respect to exposure and all other DOACs | Yes           | No                     | ATC index; reviewed by Pharmacist |
| Dabigatran                  | Incident users of dabogatran                           | Secondary                     | initiation of apixaban during July 1, 2014 through December 31, 2020 | Single            | Incident      | Day -365 to Day -1 | Perscriptions          | Product ATC code | N/A           | Incident users with respect to exposure and all other DOACs | Yes           | No                     | ATC index; reviewed by Pharmacist |
| Edoxaban                    | Incident users of edoxaban                             | Secondary                     | initiation of apixaban during July 1, 2014 through December 31, 2020 | Single            | Incident      | Day -365 to Day -1 | Perscriptions          | Product ATC code | N/A           | Incident users with respect to exposure and all other DOACs | Yes           | No                     | ATC index; reviewed by Pharmacist |
| DOAC other than Apixaban    | Incident users of Rivaroxaban, Edoxaban, or Dabigatran | Secondary                     | initiation of apixaban during July 1, 2014 through December 31, 2020 | Single            | Incident      | Day -365 to Day -1 | Perscriptions          | Product ATC code | N/A           | Incident users with respect to exposure and all other DOACs | Yes           | No                     | ATC index; reviewed by Pharmacist |
| DOAC other than Rivaroxaban | Incident users of Apixaban, Edoxaban, or Dabigatran    | Secondary                     | initiation of apixaban during July 1, 2014 through December 31, 2020 | Single            | Incident      | Day -365 to Day -1 | Perscriptions          | Product ATC code | N/A           | Incident users with respect to exposure and all other DOACs | Yes           | No                     | ATC index; reviewed by Pharmacist |
| DOAC other than Edoxaban    | Incident users Apixaban, Rivaroxaban, or Dabigatran    | Secondary                     | initiation of apixaban during July 1, 2014 through December 31, 2020 | Single            | Incident      | Day -365 to Day -1 | Perscriptions          | Product ATC code | N/A           | Incident users with respect to exposure and all other DOACs | Yes           | No                     | ATC index; reviewed by Pharmacist |
| DOAC other than Dabigatran  | Incident users of Apixaban, Rivaroxaban, or Edoxaban   | Secondary                     | initiation of apixaban during July 1, 2014 through December 31, 2020 | Single            | Incident      | Day -365 to Day -1 | Perscriptions          | Product ATC code | N/A           | Incident users with respect to exposure and all other DOACs | Yes           | No                     | ATC index; reviewed by Pharmacist |

The criterion that define the date of entry to the cohort(s) is specified in this section. There should be one row for each unique definition of a study population entry. If the study is descriptive, there may only be one row filled out. An active comparator study may have 2 rows, one for the exposure of interest and one for the comparator.

Check the pre-specified box if the exclusion criterion was specified before beginning data analyses, check the varied for sensitivity box if it was modified as part of sensitivity analyses. Specify the source of algorithms to define study entry criteria.

## Cohort

| Implementation                            |                                                                                                                                                                                                                                     |                                  |              |                   |                               |                      |               |                                                                                                                                                                                                                                                                                                                                                                                           |               |                        |                                                                                                                |
|-------------------------------------------|-------------------------------------------------------------------------------------------------------------------------------------------------------------------------------------------------------------------------------------|----------------------------------|--------------|-------------------|-------------------------------|----------------------|---------------|-------------------------------------------------------------------------------------------------------------------------------------------------------------------------------------------------------------------------------------------------------------------------------------------------------------------------------------------------------------------------------------------|---------------|------------------------|----------------------------------------------------------------------------------------------------------------|
| Criterion (Measure)                       | Criterion Details (Measure Details)                                                                                                                                                                                                 | Order Applied                    | Applied by   | Assessment Window | Care Settings (Events)        | Code Type            | Code Position | Notes                                                                                                                                                                                                                                                                                                                                                                                     | Pre-Specified | Varied for Sensitivity | Source                                                                                                         |
| Initiators of DOAC                        | Prescription for DOAs of interest. Washout for prior use described below.                                                                                                                                                           | Before selection of cohort entry | Cegedim/THIN | Day 0             | Primary care/General practice | Product ATC codes    | N/A           | B01AF01<br>B01AF02<br>B01AF03<br>B01AE07                                                                                                                                                                                                                                                                                                                                                  | Yes           | No                     | <a href="https://www.whooc.no/atcddd_index/">https://www.whooc.no/atcddd_index/</a> and Reviewed by pharmacist |
| Age                                       | 18+ on index date                                                                                                                                                                                                                   | Before selection of cohort entry | Cegedim/THIN | Day 0             | N/A                           | N/A                  | N/A           | N/A                                                                                                                                                                                                                                                                                                                                                                                       | Yes           | No                     | N/A                                                                                                            |
|                                           |                                                                                                                                                                                                                                     |                                  |              |                   |                               |                      |               | INUK.3272.00<br>INUK.3273.00<br>INUK.3274.00<br>INUK.7936A00<br>INUK.G570.00<br>INUK.G570000<br>INUK.G573.00<br>INUK.G573000<br>INUK.G573100<br>INUK.G573200<br>INUK.G573200<br>INUK.14AN.00<br>INUK.212R.00<br>INUK.6625.00<br>INUK.6A9.00<br>INUK.9hF.00<br>INUK.9hF1.00<br>INUK.9Os.00<br>INUK.9Os0.00<br>INUK.9Os1.00<br>INUK.9Os2.00<br>INUK.9Os3.00<br>INUK.9Os4.00<br>INUK.G573300 |               |                        |                                                                                                                |
| Diagnosis of Afib                         | ≥1 diagnosis code for Afib on index date or 12 months prior                                                                                                                                                                         | Before selection of cohort entry | Cegedim/THIN | [-365, 0]         | Primary care/General practice | READ Codes           | N/A           |                                                                                                                                                                                                                                                                                                                                                                                           | Yes           | No                     | <a href="#">Bujacmez_2019</a>                                                                                  |
| ≥1 risk factor for stroke other than Afib | ≥1 risk factor for stroke other than Afib on index date or in 12 months prior defined by CHADS <sub>2</sub> score (CHA <sub>2</sub> DS <sub>2</sub> -VASc) >1 for men and >2 for women                                              | Before selection of cohort entry | Cegedim/THIN | [-365, 0]         | N/A                           | READ Codes           | N/A           | Based on the CHA2DS2 score and its corresponding READ codes - INUK.38DE.00, INUK.38DE.11, INUK.38DE000                                                                                                                                                                                                                                                                                    | Yes           | No                     | Cegedim/THIN                                                                                                   |
| GP registration                           | Registered with a GP for ≥12 months prior to the index date                                                                                                                                                                         | Before selection of cohort entry | Cegedim/THIN | [-365, 0]         | N/A                           | READ Codes           | N/A           |                                                                                                                                                                                                                                                                                                                                                                                           | Yes           | No                     | Cegedim/THIN                                                                                                   |
| ≥1 medical encounter                      | ≥1 medical encounter in the 180 days prior to index date                                                                                                                                                                            | Before selection of cohort entry | Cegedim/THIN | [-180, 0]         | N/A                           | READ Codes           | N/A           |                                                                                                                                                                                                                                                                                                                                                                                           | Yes           | No                     | Cegedim/THIN                                                                                                   |
| Previous diagnoses                        | ≥ diagnosis code for the following conditions on index date or any time prior:<br>Angina<br>Cardiac valve disease (mitral stenosis, valvular replacement)<br>Congenital heart disease<br>Deep vein thrombosis<br>Pulmonary embolism | Before selection of cohort entry | Cegedim/THIN | [-∞, 0]           | Primary care/General practice | READ Codes           | N/A           | Mitral Stenosis, Valvular Replacement, Pulmonary Embolism, DVT                                                                                                                                                                                                                                                                                                                            | Yes           | No                     | <a href="#">Bujacmez_2019</a>                                                                                  |
| Washout period                            | ≥1 prescription record for any DOAC in the months prior to the index date (i.e., prevalent users)                                                                                                                                   | Before selection of cohort entry | Aetion       | [-365, 0]         | Primary care/General practice | Product ATC codes    | N/A           | New user design                                                                                                                                                                                                                                                                                                                                                                           | Yes           | No                     | Reviewed by pharmacist                                                                                         |
| Prior outcomes                            | ≥1 diagnosis code for the study outcomes of interest (stroke, MI, TIA, major bleeding events) on index date or any time prior                                                                                                       | Before selection of cohort entry | Aetion       | [-∞, 0]           | Primary care/General practice | READ and ICD10 codes | Any           | Prior stroke, MI, TIA, major bleeding event, angina from the Diagnosis and First Diagnosis tables                                                                                                                                                                                                                                                                                         | Yes           | No                     |                                                                                                                |

## Covariate Drugs

| Characteristic(Measure)                                   | Details(Measure Definition)                                                                                                                                                                                                                                                                                                                                                                                                                                                                                                                                                                                                                                                                                                                                                                                          | Type of Variable | Assessment Window | Care Settings |           | Implementation |       |                |                         |
|-----------------------------------------------------------|----------------------------------------------------------------------------------------------------------------------------------------------------------------------------------------------------------------------------------------------------------------------------------------------------------------------------------------------------------------------------------------------------------------------------------------------------------------------------------------------------------------------------------------------------------------------------------------------------------------------------------------------------------------------------------------------------------------------------------------------------------------------------------------------------------------------|------------------|-------------------|---------------|-----------|----------------|-------|----------------|-------------------------|
|                                                           |                                                                                                                                                                                                                                                                                                                                                                                                                                                                                                                                                                                                                                                                                                                                                                                                                      |                  |                   | (Events)      | Code Type | Code Position  | Notes | Pre-Specified? | Varied for Sensitivity? |
| Antianemic preparations                                   | B03*, B03X*                                                                                                                                                                                                                                                                                                                                                                                                                                                                                                                                                                                                                                                                                                                                                                                                          | Binary           | [-365, 0]         | N/A           | ATC codes | N/A            |       | Yes            | No                      |
| Antiarrhythmics                                           | C01B*                                                                                                                                                                                                                                                                                                                                                                                                                                                                                                                                                                                                                                                                                                                                                                                                                | Binary           | [-365, 0]         | N/A           | ATC codes | N/A            |       | Yes            | No                      |
| Antihyperglycemics (other than Insulins)                  | A10BJ*, A10BX04, A10BX10, A10BX13, A10BX14, A10AE54, A10AE56, A10BX07, A10BH*, A10BD07, A10BD08, A10BD09, A10BD10, A10BD11, A10BD12, A10BD13, A10BD18, A10BD22, A10BD25, A10BD19, A10BD21, A10BD24, A10BD15, A10BD16, A10BD19, A10BD20, A10BD21, A10BD23, A10BD24, A10BD25, A10BK*, A10BX09, A10BX11, A10BX12, A10B, A10BA*, A10BB, A10BC* A10BD*, A10BF*, A10BG*, A10BX*                                                                                                                                                                                                                                                                                                                                                                                                                                            | Binary           | [-365, 0]         | N/A           | ATC codes | N/A            |       | Yes            | No                      |
| Antihypertensives                                         | C09A*, C09B*, C09C*, C09D*, C09XA*, C09AA, C07AA01, C07AA02, C07AA03, C07AA05, C07AA06, C07AA07, C07AA12, C07AA14, C07AA15, C07AA16, C07AA17, C07AA19, C07AA23, C07AA27, C07AA57, C07AB, C07AB01, C07AB02, C07AB03, C07AB04, C07AB05, C07AB06, C07AB07, C07AB08, C07AB09, C07AB10, C07AB11, C07AB12, C07AB13, C07AB14, C07AB52, C07AB57, C07AG, C07AG01, C07AG02, C07B, C07BA, C07BA02, C07BA05, C07BA07, C07BA12, C07BA68, C07BB, C07BB02, C07BB03, C07BB04, C07BB06, C07BB07, C07BB12, C07BB52, C07BG, C07BG01, C07C, C07CA, C07CA02, C07CA03, C07CA17, C07CA23, C07CB, C07CB02, C07CB03, C07CB53, C07CG, C07CG01, C07D, C07DA, C07DA06, C07DE, C07DB01, C07E, C07EA, C07EB, C07F, C07FA, C07FA05, C07FB, C07FB02, C07FB03, C07FB07, C07FB12, C07FB13, C07FX, C07FX01, C07FX02, C07FX03, C07FX04, C07FX05, C07FX06 | Binary           | [-365, 0]         | N/A           | ATC codes | N/A            |       | Yes            | No                      |
| Antineoplastics                                           | L01*, L02*                                                                                                                                                                                                                                                                                                                                                                                                                                                                                                                                                                                                                                                                                                                                                                                                           | Binary           | [-365, 0]         | N/A           | ATC codes | N/A            |       | Yes            | No                      |
| Antiplatelets (excluding Aspirin)                         | B01AC, B01AC01, B01AC02, B01AC03, B01AC04, B01AC05, B01AC07, B01AC08, B01AC09, B01AC10, B01AC11, B01AC13, B01AC15, B01AC16, B01AC17, B01AC18, B01AC19, B01AC21, B01AC22, B01AC23, B01AC24, B01AC25, B01AC26, B01AC27, B01AC30                                                                                                                                                                                                                                                                                                                                                                                                                                                                                                                                                                                        | Binary           | [-365, 0]         | N/A           | ATC codes | N/A            |       | Yes            | No                      |
| Antipsychotics (Excluding BZD)                            | N05A*                                                                                                                                                                                                                                                                                                                                                                                                                                                                                                                                                                                                                                                                                                                                                                                                                | Binary           | [-365, 0]         | N/A           | ATC codes | N/A            |       | Yes            | No                      |
| Aspirin                                                   | B01AC06, B01AC56, N02BA01                                                                                                                                                                                                                                                                                                                                                                                                                                                                                                                                                                                                                                                                                                                                                                                            | Binary           | [-365, 0]         | N/A           | ATC codes | N/A            |       | Yes            | No                      |
| Benzodiazepines (BZD)                                     | N03AE01, N05BA*, N05CF*, N05CD*                                                                                                                                                                                                                                                                                                                                                                                                                                                                                                                                                                                                                                                                                                                                                                                      | Binary           | [-365, 0]         | N/A           | ATC codes | N/A            |       | Yes            | No                      |
| Bisphosphonates and other agents affecting bone structure | M05BA*, M05BB*, M05BC*, M05BX*                                                                                                                                                                                                                                                                                                                                                                                                                                                                                                                                                                                                                                                                                                                                                                                       | Binary           | [-365, 0]         | N/A           | ATC codes | N/A            |       | Yes            | No                      |



|                                        |                                                         |        |                    |     |           |     |  |     |    |
|----------------------------------------|---------------------------------------------------------|--------|--------------------|-----|-----------|-----|--|-----|----|
| Cardiac Stimulants                     | C01AA*, C01CA*, C01CE*                                  | Binary | [ <b>-365, 0</b> ] | N/A | ATC codes | N/A |  | Yes | No |
| GI Protective Agents                   | A02A*, A02BA*, A02BC*, A02BD*, A02BB01<br>A02BB02       | Binary | [ <b>-365, 0</b> ] | N/A | ATC codes | N/A |  | Yes | No |
| Insulin                                | A10A*                                                   | Binary | [ <b>-365, 0</b> ] | N/A | ATC codes | N/A |  | Yes | No |
| Lipid Lowering Agents                  | C10AA*, C10BA*, C10BX*, C10AB*                          | Binary | [ <b>-365, 0</b> ] | N/A | ATC codes | N/A |  | Yes | No |
| Nitrates Cardiac Vasodilators          | C01DA*                                                  | Binary | [ <b>-365, 0</b> ] | N/A | ATC codes | N/A |  | Yes | No |
| NSAIDs (Excluding Aspirin & APAP)      | M01A*                                                   | Binary | [ <b>-365, 0</b> ] | N/A | ATC codes | N/A |  | Yes | No |
| Opioid Analgesics                      | N02A*                                                   | Binary | [ <b>-365, 0</b> ] | N/A | ATC codes | N/A |  | Yes | No |
| Other Antidepressants (Excluding SSRI) | N06A, N06AA*, N06AF*, N06AG*, N06AX*                    | Binary | [ <b>-365, 0</b> ] | N/A | ATC codes | N/A |  | Yes | No |
| Other Antiepileptics (Excluding BZD)   | N03AA*, N03AB*, N03AC*, N03AD*, N03AF<br>N03AG*, N03AX* | Binary | [ <b>-365, 0</b> ] | N/A | ATC codes | N/A |  | Yes | No |
| SSRI                                   | N06AB*                                                  | Binary | [ <b>-365, 0</b> ] | N/A | ATC codes | N/A |  | Yes | No |
| Systemic Antibiotics                   | P02*, J01*, J02*, D01B*, P01B*, J04*, P01A<br>P01C*     | Binary | [ <b>-365, 0</b> ] | N/A | ATC codes | N/A |  | Yes | No |
| Systemic Antivirals                    | J05*                                                    | Binary | [ <b>-365, 0</b> ] | N/A | ATC codes | N/A |  | Yes | No |
| Systemic Corticosteroids               | H02A*, H02B*                                            | Binary | [ <b>-365, 0</b> ] | N/A | ATC codes | N/A |  | Yes | No |
| Vaccines and Immunoglobulins           | J06*, J07*                                              | Binary | [ <b>-365, 0</b> ] | N/A | ATC codes | N/A |  | Yes | No |
| Warfarin                               | B01AA03                                                 | Binary | [ <b>-365, 0</b> ] | N/A | ATC codes | N/A |  | Yes | No |

**STaRT-RWE Instructions:**

Define the covariate conceptually, with accompanying details as necessary. Specify which planned analyses adjust for the covariate, and how it is specified in the analysis (e.g., continuous, categorical, binary). D assessment window relative to the index date (day 0), whether there are restrictions on care setting or diagnosis position in the algorithm, and which study populations defined in Table 3B the covariate is measured. Specify the source of algorithms to define covariates.

Check the pre-specified box if the covariate was specified before beginning data analyses, check the varied for sensitivity box if it was modified as part of sensitivity analyses. Specify the source of algorithms to define covariates.

## Covariate Conditions

| Characteristic(Measure)    | Type of Variable | Assessment Window | Implementation         |                                                                            |                                |                                                                                                                                                                                                                                                                                                                                                 | Pre-Specified? | Varied for Sensitivity? | Included in Quality Framework? | Included in PS model? |
|----------------------------|------------------|-------------------|------------------------|----------------------------------------------------------------------------|--------------------------------|-------------------------------------------------------------------------------------------------------------------------------------------------------------------------------------------------------------------------------------------------------------------------------------------------------------------------------------------------|----------------|-------------------------|--------------------------------|-----------------------|
|                            |                  |                   | Care Settings (Events) | Code Type                                                                  | Code Position                  | Notes                                                                                                                                                                                                                                                                                                                                           |                |                         |                                |                       |
| Acute Kidney Injury        | Binary           | [-∞, 0]           | GP                     | ICD10 and READ codes                                                       | First Diagnosis or Diagnostics |                                                                                                                                                                                                                                                                                                                                                 | Yes            | No                      | No                             | Yes                   |
| Anemia                     | Binary           | [-∞, 0]           | GP                     | ICD10 and READ codes                                                       | First Diagnosis or Diagnostics |                                                                                                                                                                                                                                                                                                                                                 | Yes            | No                      | No                             | Yes                   |
| Asthma or COPD             | Binary           | [-∞, 0]           | GP                     | ICD10 and READ codes                                                       | First Diagnosis or Diagnostics |                                                                                                                                                                                                                                                                                                                                                 | Yes            | No                      | Yes                            | Yes                   |
| Chronic Kidney Disease     | Binary           | [-∞, 0]           | GP                     | ICD10 and READ codes                                                       | First Diagnosis or Diagnostics |                                                                                                                                                                                                                                                                                                                                                 | Yes            | No                      | No                             | Yes                   |
| Dementia                   | Binary           | [-∞, 0]           | GP                     | ICD10 and READ codes                                                       | First Diagnosis or Diagnostics |                                                                                                                                                                                                                                                                                                                                                 | Yes            | No                      | Yes                            | Yes                   |
| Diabetes Mellitus          | Binary           | [-∞, 0]           | GP                     | ICD10 and READ codes                                                       | First Diagnosis or Diagnostics |                                                                                                                                                                                                                                                                                                                                                 | Yes            | No                      | Yes                            | Yes                   |
| Heart Failure              | Binary           | [-∞, 0]           | GP                     | ICD10 and READ codes                                                       | First Diagnosis or Diagnostics |                                                                                                                                                                                                                                                                                                                                                 | Yes            | No                      | Yes                            | Yes                   |
| Hypertension               | Binary           | [-∞, 0]           | GP                     | ICD10 and READ codes                                                       | First Diagnosis or Diagnostics |                                                                                                                                                                                                                                                                                                                                                 | Yes            | No                      | Yes                            | Yes                   |
| Malignant Neoplasms        | Binary           | [-∞, 0]           | GP                     | ICD10 and READ codes                                                       | First Diagnosis or Diagnostics |                                                                                                                                                                                                                                                                                                                                                 | Yes            | No                      | No                             | Yes                   |
| Non Major Bleeding         | Binary           | [-∞, 0]           | GP                     | ICD10 and READ codes                                                       | First Diagnosis or Diagnostics |                                                                                                                                                                                                                                                                                                                                                 | Yes            | No                      | No                             | Yes                   |
| Osteoporosis/Hip Fractures | Binary           | [-∞, 0]           | GP                     | ICD10 and READ codes                                                       | First Diagnosis or Diagnostics |                                                                                                                                                                                                                                                                                                                                                 | Yes            | No                      | Yes                            | Yes                   |
| CHA2DS2 VASc score         | Categorical      | [-∞, 0]           | GP                     | ICD10 and READ codes for diagnoses, ATC codes for use of antihypertensives | First Diagnosis or Diagnostics | - Age: +1 if age 65-74, +2 if age ≥75 years<br>- Gender: +1 if female<br>- Heart failure: +1 if any history<br>- Stroke, TIA, or thromboembolism +1 if any history<br>- Vascular disease (MI, PAD, aortic plaque): +1 if any history<br>- Diabetes mellitus: +1 if any history<br>- Hypertension or use of antihypertensives: +1 if any history | Yes            | No                      | Yes                            | Yes                   |

| Follow Up                                                                 |                                     |                                                                                              |                |                         |
|---------------------------------------------------------------------------|-------------------------------------|----------------------------------------------------------------------------------------------|----------------|-------------------------|
| Follow Up Begins                                                          |                                     |                                                                                              |                |                         |
| Begins                                                                    |                                     | Day 1                                                                                        | Pre-Specified? | Varied for Sensitivity? |
|                                                                           |                                     |                                                                                              | Yes            | No                      |
| Follow Up Ends                                                            |                                     |                                                                                              |                |                         |
| Ends                                                                      | Select All That Apply               | Specify Details                                                                              | Pre-Specified? | Varied for Sensitivity? |
| Date of Outcome                                                           | <input checked="" type="checkbox"/> | Primary analysis (ITT) and AT sensitivity analysis                                           | Yes            | No                      |
| Date of Death                                                             | <input checked="" type="checkbox"/> | Primary analysis (ITT) and AT sensitivity analysis                                           | Yes            | No                      |
| End of patient data                                                       | <input checked="" type="checkbox"/> | Primary analysis (ITT) and AT sensitivity analysis                                           | Yes            | No                      |
| End of registration with GP                                               | <input checked="" type="checkbox"/> | Primary analysis (ITT) and AT sensitivity analysis                                           | Yes            | No                      |
| Crossover of exposure group or addition of drug from other exposure group | <input checked="" type="checkbox"/> | AT sensitivity analysis only                                                                 | Yes            | Yes                     |
| Termination of exposure                                                   | <input checked="" type="checkbox"/> | AT sensitivity analysis only. Defined allowing a 30-day grace period and 30-day risk window. | Yes            | Yes                     |

**STaRT-RWE Instructions:**

Specify when follow up begins relative to the index date (day 0) and select each criterion that is used to end follow up.

Check the pre-specified box if the outcome parameters were specified before beginning data analyses, check the varied for sensitivity box if the parameters were modified as part of sensitivity analyses.

## Outcomes

| Outcome Name<br>(Measure)          | Outcome Measurement<br>Characteristics(Measure<br>Definition)                                                                                 | Primary<br>Outcome? | Type of Outcome | Washout Window | Care Settings<br>(Events)     | Implementation |               |                        |     | Pre-Specified? | Varied for<br>Sensitivity?                                                                                                                                                                                                                                                                                                                                                                                                                                                                                                                                                                                                                                                     | Citations |
|------------------------------------|-----------------------------------------------------------------------------------------------------------------------------------------------|---------------------|-----------------|----------------|-------------------------------|----------------|---------------|------------------------|-----|----------------|--------------------------------------------------------------------------------------------------------------------------------------------------------------------------------------------------------------------------------------------------------------------------------------------------------------------------------------------------------------------------------------------------------------------------------------------------------------------------------------------------------------------------------------------------------------------------------------------------------------------------------------------------------------------------------|-----------|
|                                    |                                                                                                                                               |                     |                 |                |                               | Code Type      | Code Position | Notes                  |     |                |                                                                                                                                                                                                                                                                                                                                                                                                                                                                                                                                                                                                                                                                                |           |
| Stroke (Ischemic or hemorrhagic)   | See Code List Catalog tab                                                                                                                     | Yes                 | Incident        | [-∞, 0]        | Primary care/General practice | READ & ICD-10  | Any           | From Diagnostics table | Yes | No             | Rannikmäe K, Ngho K, Bush K, Al-Shahi Salm R, Doubal F, Flaig R, Henshall DE, Hutchison A, Nolan J, Osborne S, Samarasekera N, Schrier C, Whiteley W, Wilkinson T, Wilson K, Woodfield R, Zhang Q, Allen N, Sudlow CLM. Accuracy of identifying incident stroke cases from linked health care data in UK Biobank. <i>Neurology</i> . 2020 Aug 11;95(6):e697-e707. doi: 10.1212/WNL.00000000000009924. Epub 2020 2. PMID: 32616677; PMCID: PMC7455356.                                                                                                                                                                                                                          |           |
| All-cause mortality                | State Code = "D - Dead"                                                                                                                       | No                  | Incident        | [-∞, 0]        | Primary care/General practice | N/A            | N/A           |                        | Yes | No             |                                                                                                                                                                                                                                                                                                                                                                                                                                                                                                                                                                                                                                                                                |           |
| Myocardial infarction              | See Code List Catalog tab                                                                                                                     | No                  | Incident        | [-∞, 0]        | Primary care/General practice | READ & ICD-10  | Any           | From Diagnostics table | Yes | No             | Arana A, Margulis AV, Varas-Lorenzo C, Bul C, Gilsenan A, McQuay LJ, Reynolds M, Reboredo C, Franks B, de Vogel S, Appenteng K, Perez-Guthann S. Validation of cardiovascular outcomes and risk factors in the Clinical Practice Research Datalink in the United Kingdom. <i>Pharmacoepidemiol Drug Saf</i> . 2021 Feb;30(2):237-247. doi: 10.1002/pds.5150. Epub 2020 Oct 28. PMID: 33091194; PMCID: PMC7821285.<br><br>Metcalfe A, Neudam A, Forde S, et al. Case definitions for acute myocardial infarction in administrative databases and their impact on in hospital mortality rates. <i>Health Serv Res</i> . 2013;48(1):290-318. doi:10.1111/j.1475-6773.2012.01440.x |           |
| Transient ischemic attack          | See Code List Catalog tab                                                                                                                     | No                  | Incident        | [-∞, 0]        | Primary care/General practice | READ & ICD-10  | Any           | From Diagnostics table | Yes | No             | Andrade SE, Harrold LR, Tjia J, et al. A systematic review of validated methods for identifying cerebrovascular accident or transient ischemic attack using administrative data. <i>Pharmacoepidemiol Drug Saf</i> . 2012;21 Suppl 1(Suppl 1):100-128. doi:10.1002/pds.2312                                                                                                                                                                                                                                                                                                                                                                                                    |           |
| Major bleeding events              | Defined as a composite outcome of major intracranial (including hemorrhagic stroke), gastrointestinal, and urogenital bleeds; see code lists. | No                  | Incident        | [-∞, 0]        | Primary care/General practice | READ & ICD-10  | Any           | From Diagnostics table | Yes | No             | Pasea L, Chung SC, Pujades-Rodriguez M, et al. Bleeding in cardiac patients prescribed antithrombotic drugs: electronic health record phenotyping algorithms, incidence, trends and prognosis. <i>BMC Med</i> . 2019;17(1):206. Published 2019 Nov 20. doi:10.1186/s12916-019-1438-y                                                                                                                                                                                                                                                                                                                                                                                           |           |
| Composite angina MI / stroke (AMS) | Composite endpoint of angina, myocardial infarction, and stroke.; see code lists.                                                             | No                  | Incident        | [-∞, 0]        | Primary care/General practice | READ & ICD-10  | Any           | From Diagnostics table | Yes | No             |                                                                                                                                                                                                                                                                                                                                                                                                                                                                                                                                                                                                                                                                                |           |

| Analysis Plan Specification                                                                     |                                                                                                                                                                                                                                                               |                        |                          |                                                     |                           |                           |                                                  |                          |                                                     |                                                   |
|-------------------------------------------------------------------------------------------------|---------------------------------------------------------------------------------------------------------------------------------------------------------------------------------------------------------------------------------------------------------------|------------------------|--------------------------|-----------------------------------------------------|---------------------------|---------------------------|--------------------------------------------------|--------------------------|-----------------------------------------------------|---------------------------------------------------|
|                                                                                                 | Primary Objective                                                                                                                                                                                                                                             | Secondary Objective I  | Secondary Objective II   | Secondary Objective III                             | Secondary Objective IV    | Secondary Objective V     | Secondary Objective VI                           | Secondary Objective VII  | Secondary Objective VIII                            | Secondary Objective IX                            |
| <b>Hypothesis</b>                                                                               | Null hypothesis HRR=1                                                                                                                                                                                                                                         | Null hypothesis HRR=1  | Null hypothesis HRR=1    | Null hypothesis HRR=1                               | Null hypothesis HRR=1     | Null hypothesis HRR=1     | Null hypothesis HRR=1                            | Null hypothesis HRR=1    | Null hypothesis HRR=1                               | Null hypothesis HRR=1                             |
|                                                                                                 | Initiators of apixaban                                                                                                                                                                                                                                        | Initiators of apixaban | Initiators of apixaban   | Initiators of apixaban                              | Initiators of rivaroxaban | Initiators of rivaroxaban | Initiators of rivaroxaban                        | Initiators of edoxaban   | Initiators of edoxaban                              | Initiators of dabigatran                          |
| <b>Study Populations</b>                                                                        | Initiators of rivaroxaban                                                                                                                                                                                                                                     | Initiators of edoxaban | Initiators of dabigatran | Initiators of rivaroxaban, edoxaban, and dabigatran | Initiators of edoxaban    | Initiators of dabigatran  | Initiators of apixaban, edoxaban, and dabigatran | Initiators of dabigatran | Initiators of apixaban, rivaroxaban, and dabigatran | Initiators of apixaban, rivaroxaban, and edoxaban |
| <b>Outcome</b>                                                                                  | Incidence of stroke                                                                                                                                                                                                                                           |                        |                          |                                                     |                           |                           |                                                  |                          |                                                     |                                                   |
| <b>Software</b>                                                                                 |                                                                                                                                                                                                                                                               |                        |                          |                                                     |                           |                           |                                                  |                          |                                                     |                                                   |
| <b>Model(s)</b>                                                                                 | comparisons as mutually exclusive cohorts.                                                                                                                                                                                                                    |                        |                          |                                                     |                           |                           |                                                  |                          |                                                     |                                                   |
| <b>Confounding Adjustment Method (check all that apply and provide details where specified)</b> |                                                                                                                                                                                                                                                               |                        |                          |                                                     |                           |                           |                                                  |                          |                                                     |                                                   |
|                                                                                                 | Bivariate                                                                                                                                                                                                                                                     |                        |                          |                                                     |                           |                           |                                                  |                          |                                                     |                                                   |
|                                                                                                 | Multivariate                                                                                                                                                                                                                                                  | ✓                      |                          |                                                     |                           |                           |                                                  |                          |                                                     |                                                   |
| Propensity Score Matching (Specify matching algorithm, ratio, and caliper)                      | ✓; Propensity score matching between exposure groups will be performed using 1:1 nearest neighbor matching without replacement with a maximum matching caliper of 0.01                                                                                        |                        |                          |                                                     |                           |                           |                                                  |                          |                                                     |                                                   |
| Propensity Score Weighting (specify formula, weighting, and truncation decisions)               |                                                                                                                                                                                                                                                               |                        |                          |                                                     |                           |                           |                                                  |                          |                                                     |                                                   |
| Propensity Score Stratification (specify strata definitions)                                    |                                                                                                                                                                                                                                                               |                        |                          |                                                     |                           |                           |                                                  |                          |                                                     |                                                   |
| Other (Specify details)                                                                         | ✓; High-dimensional propensity score analysis will be used as sensitivity analysis                                                                                                                                                                            |                        |                          |                                                     |                           |                           |                                                  |                          |                                                     |                                                   |
| <b>Missing Data Method (select all that apply)</b>                                              |                                                                                                                                                                                                                                                               |                        |                          |                                                     |                           |                           |                                                  |                          |                                                     |                                                   |
|                                                                                                 | Missing Indicators                                                                                                                                                                                                                                            | ✓                      |                          |                                                     |                           |                           |                                                  |                          |                                                     |                                                   |
|                                                                                                 | Complete Case                                                                                                                                                                                                                                                 |                        |                          |                                                     |                           |                           |                                                  |                          |                                                     |                                                   |
|                                                                                                 | Last Value Carried Forward                                                                                                                                                                                                                                    |                        |                          |                                                     |                           |                           |                                                  |                          |                                                     |                                                   |
|                                                                                                 | Multiple Imputation (specify variables)                                                                                                                                                                                                                       |                        |                          |                                                     |                           |                           |                                                  |                          |                                                     |                                                   |
|                                                                                                 | Other (Specify Details)                                                                                                                                                                                                                                       |                        |                          |                                                     |                           |                           |                                                  |                          |                                                     |                                                   |
| <b>Subgroup Analysis</b>                                                                        | DOACs initiators with prior warfarin use; age (<65, 65-74, and >75 years); concomitant aspirin use; CHADS <sub>2</sub> score (1, 2, and >3), and selected comorbid conditions, e.g. diabetes, heart failure, and BMI status (<30 and >30 kg/m <sup>2</sup> ). |                        |                          |                                                     |                           |                           |                                                  |                          |                                                     |                                                   |

| Sensitivity Analyses (SA)                                                                          |                                                                                                                                                 |                                                                                                                                                                                                                                       |                                                                                                                                                            |                                                                                                                |
|----------------------------------------------------------------------------------------------------|-------------------------------------------------------------------------------------------------------------------------------------------------|---------------------------------------------------------------------------------------------------------------------------------------------------------------------------------------------------------------------------------------|------------------------------------------------------------------------------------------------------------------------------------------------------------|----------------------------------------------------------------------------------------------------------------|
| Sensitivity Analysis                                                                               | What is the parameter being varied? (Be clear what is changing from)                                                                            | Why? (What do you expect to learn?)                                                                                                                                                                                                   | Strengths of the Sensitivity Analysis compared to the Primary?                                                                                             | Weaknesses of the Sensitivity Analysis compared to the Primary?                                                |
| As-treated follow-up                                                                               | Primary (ITT) analysis does not censor on treatment discontinuation or crossover. This is changed to censoring on discontinuation or crossover. | ITT and AT analyses are subject to different biases (exposure misclassification versus potential for informative censoring). Running both can test influence of these effects and help bound the range of plausible effect estimates. | Avoids misclassification of time following discontinuation of crossover as exposure time.                                                                  | Estimates may be biased if discontinuation and crossover are driven by symptoms or perceived lack of efficacy. |
| Limiting analysis up to February 28, 2020 [Note, this was not completed due to sample size issues] | End of data is truncated to Feb 28th, 2020 instead of Dec 31, 2020.                                                                             | With the COVID-19 pandemic starting in March 2020, there is a possibility that patients' care pathways were interrupted. This could impact results.                                                                                   | Eliminates the possibility of confounding by COVID-19, e.g. if COVID results in temporal trends in outcomes, and there are temporal trends in drug choice. | Reduced follow-up time and power                                                                               |
| high-dimensional propensity score (hdPS) analysis                                                  |                                                                                                                                                 | A difference in estimates between the hdPS and PS analysis could indicate the presence of uncontrolled confounding in the PS analysis.                                                                                                | May reduce confounding by identifying confounders and proxies missed in user-specified PS model                                                            | there is a slight risk of including instrument-like variables in a hdPS model, introducing bias                |

*This Measure Appendix is based largely on the START-RWE templates proposed by Wang et. al., 2020.*

| Inclusion or Exclusion for primary comparison of apixabar v. rivaroxaban                                                                          |                                                                         | Order of Application | TOTAL              |         |
|---------------------------------------------------------------------------------------------------------------------------------------------------|-------------------------------------------------------------------------|----------------------|--------------------|---------|
| Criterion (Measure)                                                                                                                               | Excluded Patients                                                       |                      | Remaining Patients |         |
| All patients initiating DOACs between 01-07-2013 through 12-31-2020                                                                               | N/A                                                                     | N/A                  | N/A                | 124,106 |
| Excluded due to age $\leq 18$ at index                                                                                                            | Age                                                                     | 1                    | 50                 | 124,056 |
| Excluded due to no diagnosis of non-valvular Afib in 12 months prior to index                                                                     | Non-valvular Afib                                                       | 2                    | 77,747             | 46,309  |
| Excluded due to CHA2DS2 VASc $< 1$ for men and $< 2$ for women                                                                                    | CHA2DS2 VASc score                                                      | 3                    | 30,613             | 15,696  |
| Excluded due to $< 12$ months prior registration with GP and $< 1$ medical encounter in 6mo prior to index                                        | GP registration                                                         | 4                    | 952                | 14,744  |
| Excluded due to any prior diagnosis of cardiac valve disease (mitral stenosis, valvular replacement, deep vein thrombosis, or pulmonary embolism) | Cardiac valve disease                                                   | 5                    | 753                | 13,991  |
| Excluded due to history of a DOAC prescription in the 365 days prior to a qualifying DOAC initiation                                              | DOAC                                                                    | 6                    | 7255               | 6,736   |
| Excluded due to history of stroke, MI, TIA, major bleeding event, angina, or congenital heart disease at any point prior to index                 | Stroke, MI, TIA, major bleeding event, angina, congenital heart disease | 7                    | 1019               | 5,717   |
| Excluded due to censoring prior to the start of follow-up                                                                                         |                                                                         | 8                    | 62                 | 5,655   |
| Not included in propensity score matching for inferential analyses                                                                                |                                                                         | 9                    | 1977               | 3,678   |
| Inclusion or Exclusion for primary comparison of apixabar v. DOACs                                                                                |                                                                         | Order of Application | TOTAL              |         |
| Criterion (Measure)                                                                                                                               | Excluded Patients                                                       |                      | Remaining Patients |         |
| All patients initiating DOACs between 01-07-2013 through 12-31-2020                                                                               | N/A                                                                     | N/A                  | N/A                | 124,106 |
| Excluded due to age $\leq 18$ at index                                                                                                            | Age                                                                     | 1                    | 50                 | 124,056 |
| Excluded due to no diagnosis of non-valvular Afib in 12 months prior to index                                                                     | Non-valvular Afib                                                       | 2                    | 77,747             | 46,309  |
| Excluded due to CHA2DS2 VASc $< 1$ for men and $< 2$ for women                                                                                    | CHA2DS2 VASc score                                                      | 3                    | 30,613             | 15,696  |
| Excluded due to $< 12$ months prior registration with GP and $< 1$ medical encounter in 6mo prior to index                                        | GP registration                                                         | 4                    | 952                | 14,744  |
| Excluded due to any prior diagnosis of cardiac valve disease (mitral stenosis, valvular replacement, deep vein thrombosis, or pulmonary embolism) | Cardiac valve disease                                                   | 5                    | 753                | 13,991  |
| Excluded due to history of a DOAC prescription in the 365 days prior to a qualifying DOAC initiation                                              | DOAC                                                                    | 6                    | 7255               | 6,736   |
| Excluded due to history of stroke, MI, TIA, major bleeding event, angina, or congenital heart disease at any point prior to index                 | Stroke, MI, TIA, major bleeding event, angina, congenital heart disease | 7                    | 1019               | 5,717   |
| Excluded due to censoring prior to the start of follow-up                                                                                         |                                                                         | 8                    | 62                 | 5,655   |

| Inclusion or Exclusion for primary comparison of rivaroxiban v. DOACs                                                                             |                     | Order of Application | TOTAL             |                    |
|---------------------------------------------------------------------------------------------------------------------------------------------------|---------------------|----------------------|-------------------|--------------------|
|                                                                                                                                                   | Criterion (Measure) |                      | Excluded Patients | Remaining Patients |
| Not included in propensity score matching for inferential analyses                                                                                |                     | 9                    | 1,103             | 4,552              |
| All patients initiating DOACs between 01-07-2013 through 12-31-2020                                                                               |                     | N/A                  | N/A               | 124,106            |
| Excluded due to age $\leq 18$ at index                                                                                                            |                     | 1                    | 50                | 124,056            |
| Excluded due to no diagnosis of non-valvular Afib in 12 months prior to index                                                                     |                     | 2                    | 77,747            | 46,309             |
| Excluded due to CHA2DS2 VASc $< 1$ for men and $< 2$ for women                                                                                    |                     | 3                    | 30,613            | 15,696             |
| Excluded due to $< 12$ months prior registration with GP and $< 1$ medical encounter in 6mo prior to index                                        |                     | 4                    | 952               | 14,744             |
| Excluded due to any prior diagnosis of cardiac valve disease (mitral stenosis, valvular replacement, deep vein thrombosis, or pulmonary embolism) |                     | 5                    | 753               | 13,991             |
| Excluded due to history of a DOAC prescription in the 365 days prior to a qualifying DOAC initiation                                              |                     | 6                    | 7255              | 6,736              |
| Excluded due to history of stroke, MI, TIA, major bleeding event, angina, or congenital heart disease at any point prior to index                 |                     | 7                    | 1019              | 5,717              |
| Excluded due to censoring prior to the start of follow-up                                                                                         |                     | 8                    | 62                | 5,655              |
| Not included in propensity score matching for inferential analyses                                                                                |                     | 9                    | 1,685             | 3,970              |



|          |   |
|----------|---|
| Software | R |
|----------|---|

| Sample Size & Power Calculations for primary comparison (apixaban vs. rivoraxiban)                             |                                                                      |                                             |                                 |
|----------------------------------------------------------------------------------------------------------------|----------------------------------------------------------------------|---------------------------------------------|---------------------------------|
| Population Assumptions                                                                                         | Analysis                                                             | Range                                       | Source for Estimated Parameters |
| Assuming 1:1 PS matching with 1,851 patients per group and an unstratified stroke risk of 27.15/1,000 patients | Minimum detectable HR with 80% power using intent to treat follow-up | Minimum detectable HR with 80% power = 0.57 | Feasibility analysis            |
| Assuming 1:1 PS matching with 1,851 patients per group and an unstratified stroke risk of 16.17/1,000 patients | Minimum detectable HR with 80% power using as treated follow-up      | Minimum detectable HR with 80% power = 0.48 | Feasibility analysis            |

| Sample Size & Power Calculations for primary comparison (apixaban vs. other DOACs)                             |                                                                      |                                             |                                 |
|----------------------------------------------------------------------------------------------------------------|----------------------------------------------------------------------|---------------------------------------------|---------------------------------|
| Population Assumptions                                                                                         | Analysis                                                             | Range                                       | Source for Estimated Parameters |
| Assuming 1:1 PS matching with 2,305 patients per group and an unstratified stroke risk of 16.63/1,000 patients | Minimum detectable HR with 80% power using intent to treat follow-up | Minimum detectable HR with 80% power = 0.60 | Feasibility analysis            |

| Sample Size & Power Calculations for primary comparison (rivoraxiban vs. other DOACs)                                     |                                                                      |                                             |                                 |
|---------------------------------------------------------------------------------------------------------------------------|----------------------------------------------------------------------|---------------------------------------------|---------------------------------|
| Population Assumptions                                                                                                    | Analysis                                                             | Range                                       | Source for Estimated Parameters |
| Assuming 1:1 PS matching with a total of 2,023 patients per group and an unstratified stroke risk of 27.41/1,000 patients | Minimum detectable HR with 80% power using intent to treat follow-up | Minimum detectable HR with 80% power = 0.58 | Feasibility analysis            |

| Measure                                                   | ATC Codes                                                                                                   | Source      |                                                                                                                                                                                                                                                                                                                                                                                                                                 |                   |
|-----------------------------------------------------------|-------------------------------------------------------------------------------------------------------------|-------------|---------------------------------------------------------------------------------------------------------------------------------------------------------------------------------------------------------------------------------------------------------------------------------------------------------------------------------------------------------------------------------------------------------------------------------|-------------------|
| <b>DOCA exposure (ATC Codes)</b>                          |                                                                                                             |             |                                                                                                                                                                                                                                                                                                                                                                                                                                 |                   |
| rivaroxaban                                               | B01AF02                                                                                                     |             |                                                                                                                                                                                                                                                                                                                                                                                                                                 |                   |
| dabigatran                                                | B01AF01                                                                                                     |             |                                                                                                                                                                                                                                                                                                                                                                                                                                 |                   |
| apixaban                                                  | B01AF03                                                                                                     |             |                                                                                                                                                                                                                                                                                                                                                                                                                                 |                   |
| edoxaban                                                  | B01AE07                                                                                                     |             |                                                                                                                                                                                                                                                                                                                                                                                                                                 |                   |
| <b>Covariate Drugs (ATC Codes)</b>                        |                                                                                                             |             |                                                                                                                                                                                                                                                                                                                                                                                                                                 |                   |
| Antianemic preparations                                   | B03*, B03X*                                                                                                 |             |                                                                                                                                                                                                                                                                                                                                                                                                                                 |                   |
| Antiarrhythmics                                           | C01B*                                                                                                       |             |                                                                                                                                                                                                                                                                                                                                                                                                                                 |                   |
| Antihyperglycemics (other than Insulins)                  | A10BJ*, A10BX04, A10BX10, A10BX13, A10BX14, A10AE54, A10AE56, A10BX07, A10BH*, A10BD07, A10BD08, A10BD09,   |             |                                                                                                                                                                                                                                                                                                                                                                                                                                 |                   |
| Antihypertensives                                         | C09A*, C09B*, C09C*, C09D*, C09XA*, C08*, C07AA, C07AA01, C07AA02, C07AA03, C07AA05, C07AA06, C07AA07, C07A |             |                                                                                                                                                                                                                                                                                                                                                                                                                                 |                   |
| Antineoplastics                                           | L01*, L02*                                                                                                  |             |                                                                                                                                                                                                                                                                                                                                                                                                                                 |                   |
| Antiplatelets (excluding Aspirin)                         | B01AC, B01AC01, B01AC02, B01AC03, B01AC04, B01AC05, B01AC07, B01AC08, B01AC09, B01AC10, B01AC11, B01AC1     |             |                                                                                                                                                                                                                                                                                                                                                                                                                                 |                   |
| Antipsychotics (Excluding BZD)                            | N05A*                                                                                                       |             |                                                                                                                                                                                                                                                                                                                                                                                                                                 |                   |
| Aspirin                                                   | B01AC06, B01AC56, N02BA01                                                                                   |             |                                                                                                                                                                                                                                                                                                                                                                                                                                 |                   |
| Benzodiazepines (BZD)                                     | N03AE01, N05BA*, N05CF*, N05CD*                                                                             |             |                                                                                                                                                                                                                                                                                                                                                                                                                                 |                   |
| Bisphosphonates and other agents affecting bone structure | M05BA*, M05BB*, M05BC*, M05BX*                                                                              |             |                                                                                                                                                                                                                                                                                                                                                                                                                                 |                   |
| Cardiac Stimulants                                        | C01AA*, C01CA*, C01CE*                                                                                      |             |                                                                                                                                                                                                                                                                                                                                                                                                                                 |                   |
| GI Protective Agents                                      | A02A*, A02BA*, A02BC*, A02BD*, A02BB01, A02BB02                                                             |             |                                                                                                                                                                                                                                                                                                                                                                                                                                 |                   |
| Insulin                                                   | A10A*                                                                                                       |             |                                                                                                                                                                                                                                                                                                                                                                                                                                 |                   |
| Lipid Lowering Agents                                     | C10AA*, C10BA*, C10BX*, C10AB*                                                                              |             |                                                                                                                                                                                                                                                                                                                                                                                                                                 |                   |
| Nitrates Cardiac Vasodilators                             | C01DA*                                                                                                      |             |                                                                                                                                                                                                                                                                                                                                                                                                                                 |                   |
| NSAIDs (Excluding Aspirin & APAP)                         | M01A*                                                                                                       |             |                                                                                                                                                                                                                                                                                                                                                                                                                                 |                   |
| Opioid Analgesics                                         | N02A*                                                                                                       |             |                                                                                                                                                                                                                                                                                                                                                                                                                                 |                   |
| Other Antidepressants (Excluding SSRI)                    | N06A, N06AA*, N06AF*, N06AG*, N06AX*                                                                        |             |                                                                                                                                                                                                                                                                                                                                                                                                                                 |                   |
| Other Antiepileptics (Excluding BZD)                      | N03AA*, N03AB*, N03AC*, N03AD*, N03AF*, N03AG*, N03AX*                                                      |             |                                                                                                                                                                                                                                                                                                                                                                                                                                 |                   |
| SSRI                                                      | N06AB*                                                                                                      |             |                                                                                                                                                                                                                                                                                                                                                                                                                                 |                   |
| Systemic Antibiotics                                      | P02*, J01*, J02*, D01B*, P01B*, J04*, P01A*, P01C*                                                          |             |                                                                                                                                                                                                                                                                                                                                                                                                                                 |                   |
| Systemic Antivirals                                       | J05*                                                                                                        |             |                                                                                                                                                                                                                                                                                                                                                                                                                                 |                   |
| Systemic Corticosteroids                                  | H02A*, H02B*                                                                                                |             |                                                                                                                                                                                                                                                                                                                                                                                                                                 |                   |
| Vaccines and Immunoglobulins                              | J06*, J07*                                                                                                  |             |                                                                                                                                                                                                                                                                                                                                                                                                                                 |                   |
| Warfarin                                                  | B01AA03                                                                                                     |             |                                                                                                                                                                                                                                                                                                                                                                                                                                 |                   |
| Measure                                                   | READ Codes                                                                                                  | ICD10 codes | READ Code Source                                                                                                                                                                                                                                                                                                                                                                                                                | ICD10 Code Source |
| <b>Chart Inclusion/Exclusion Criteria</b>                 |                                                                                                             |             |                                                                                                                                                                                                                                                                                                                                                                                                                                 |                   |
| Atrial Fibrillation                                       | INUK.3272.00 ECG: ATRIAL FIBRILLATION INUK.3273.00                                                          | N/A         | Ruigómez A, Vora P, Balabanova Y, et al. Discontinuation of non-Vitamin K antagonist oral anticoagulants in patients with non-valvular atrial fibrillation: a population-based cohort study using primary care data from The Health Improvement Network in the U [published correction appears in BMJ Open. 2020 Apr 16;10(4):e031342corr1]. BMJ Open. 2019;9(10):e031342. Published 20 Oct 18. doi:10.1136/bmjopen-2019-031342 | N/A               |
| Mitral Stenosis                                           | INUK.G110.00 Mitral stenosis INUK.G110.11 Rheumatic r                                                       | N/A         | Ruigómez A, Vora P, Balabanova Y, et al. Discontinuation of non-Vitamin K antagonist oral anticoagulants in patients with non-valvular atrial fibrillation: a population-based cohort study using primary care data from The Health Improvement Network in the U [published correction appears in BMJ Open. 2020 Apr 16;10(4):e031342corr1]. BMJ Open. 2019;9(10):e031342. Published 20 Oct 18. doi:10.1136/bmjopen-2019-031342 | N/A               |

|                                        |                                                                                                                                                                                                                                                                                                                                                                                                                                                                                                                                                                                                                                                                                                                                                                                                                                                                                                                  |                  |                                                                                                                                                                                                                                                                                                                                                                                                                                                    |                                                                                                                                                                                                                                                                                                                                                                                                                                                    |
|----------------------------------------|------------------------------------------------------------------------------------------------------------------------------------------------------------------------------------------------------------------------------------------------------------------------------------------------------------------------------------------------------------------------------------------------------------------------------------------------------------------------------------------------------------------------------------------------------------------------------------------------------------------------------------------------------------------------------------------------------------------------------------------------------------------------------------------------------------------------------------------------------------------------------------------------------------------|------------------|----------------------------------------------------------------------------------------------------------------------------------------------------------------------------------------------------------------------------------------------------------------------------------------------------------------------------------------------------------------------------------------------------------------------------------------------------|----------------------------------------------------------------------------------------------------------------------------------------------------------------------------------------------------------------------------------------------------------------------------------------------------------------------------------------------------------------------------------------------------------------------------------------------------|
| Valvular Replacement                   | INUK.7910.12 Replacement of mitral valve INUK.7910000                                                                                                                                                                                                                                                                                                                                                                                                                                                                                                                                                                                                                                                                                                                                                                                                                                                            | N/A              | Ruigómez A, Vora P, Balabanova Y, et al. Discontinuation of non-Vitamin K antagonist oral anticoagulants in patients with non-valvular atrial fibrillation: a population-based cohort study using primary care data from The Health Improvement Network in the U [published correction appears in BMJ Open. 2020 Apr 16;10(4):e031342corr1]. BMJ Open. 2019;9(10):e031342. Published 20 Oct 18. doi:10.1136/bmjopen-2019-031342                    | N/A                                                                                                                                                                                                                                                                                                                                                                                                                                                |
| Pulmonary Embolism                     | INUK.G401100 Recurrent pulmonary embolism INUK.G401000                                                                                                                                                                                                                                                                                                                                                                                                                                                                                                                                                                                                                                                                                                                                                                                                                                                           | N/A              | Ruigómez A, Vora P, Balabanova Y, et al. Discontinuation of non-Vitamin K antagonist oral anticoagulants in patients with non-valvular atrial fibrillation: a population-based cohort study using primary care data from The Health Improvement Network in the U [published correction appears in BMJ Open. 2020 Apr 16;10(4):e031342corr1]. BMJ Open. 2019;9(10):e031342. Published 20 Oct 18. doi:10.1136/bmjopen-2019-031342                    | N/A                                                                                                                                                                                                                                                                                                                                                                                                                                                |
| Deep Vein Thrombosis                   | INUK.G801.11 Deep vein thrombosis INUK.G801.12                                                                                                                                                                                                                                                                                                                                                                                                                                                                                                                                                                                                                                                                                                                                                                                                                                                                   | Deep             | N/A                                                                                                                                                                                                                                                                                                                                                                                                                                                | N/A                                                                                                                                                                                                                                                                                                                                                                                                                                                |
| <b>Exclusion criteria and outcomes</b> |                                                                                                                                                                                                                                                                                                                                                                                                                                                                                                                                                                                                                                                                                                                                                                                                                                                                                                                  |                  |                                                                                                                                                                                                                                                                                                                                                                                                                                                    |                                                                                                                                                                                                                                                                                                                                                                                                                                                    |
| Stroke (Ischemic and Hemorrhagic)      | INUK.G60..00, INUK.G600.00, INUK.G601.00, INUK.G602.00, INUK.G603.00, INUK.G604.00, INUK.G605.00, INUK.G606.00, INUK.G60X.00, INUK.G60z.00, INUK.G61..00, INUK.G61..11, INUK.G61..12, INUK.G610.00, INUK.G611.00, INUK.G612.00, INUK.G613.00, INUK.G614.00, INUK.G615.00, INUK.G616.00, INUK.G617.00, INUK.G618.00, INUK.G619.00, INUK.G61X.00, INUK.G61X000, INUK.G61X100, INUK.G61z.00, INUK.G63y000, INUK.G63y100, INUK.G64..00, INUK.G64..11, INUK.G64..12, INUK.G64..13, INUK.G640.00, INUK.G640000, INUK.G641.00, INUK.G641.11, INUK.G641000, INUK.G64z.00, INUK.G64z.11, INUK.G64z.12, INUK.G64z000, INUK.G64z100, INUK.G64z111, INUK.G64z200, INUK.G64z300, INUK.G64z400, INUK.G66..00, INUK.G66..11, INUK.G66..12, INUK.G66..13, INUK.G667.00, INUK.G668.00, INUK.G676000, INUK.G6W..00, INUK.G6X..00, INUK.Gyu6000, INUK.Gyu6100, INUK.Gyu6200, INUK.Gyu6300, INUK.Gyu6E00, INUK.Gyu6F00, INUK.Gyu6G00 | I60*, I61*, I63* | Rannikmäe K, Ngho K, Bush K, Al-Shahi Salman R, Doubal F, Flaig R, Henshall DE, Hutchison A, Nolan J, Osborne S, Samarasekera N, Schnier C, Whiteley W, Wilkinson T, Wilson K, Woodfield R, Zhan Q, Allen N, Sudlow CLM. Accuracy of identifying incident stroke cases from linked health care data in UK Biobank. Neurology. 2020 Aug 11;95(6):e697-e707. doi: 10.1212/WNL.00000000000009924. Epub 2020 Jul 2. PMID: 32616677; PMCID: PMC7455356. | Rannikmäe K, Ngho K, Bush K, Al-Shahi Salman R, Doubal F, Flaig R, Henshall DE, Hutchison A, Nolan J, Osborne S, Samarasekera N, Schnier C, Whiteley W, Wilkinson T, Wilson K, Woodfield R, Zhan Q, Allen N, Sudlow CLM. Accuracy of identifying incident stroke cases from linked health care data in UK Biobank. Neurology. 2020 Aug 11;95(6):e697-e707. doi: 10.1212/WNL.00000000000009924. Epub 2020 Jul 2. PMID: 32616677; PMCID: PMC7455356. |

|                             |                                                                                                                                                                                                                                                                                                                                                                                                                                                                                                                                                                                                                                                                                                                                                                                                                                                                                                                                                                                        |                                                                                                                                                                                                                                                                                                                     |                                                                                                                                                                                                                                                                                                                                                                                                                     |                                                                                                                                                                                                                                                                                     |
|-----------------------------|----------------------------------------------------------------------------------------------------------------------------------------------------------------------------------------------------------------------------------------------------------------------------------------------------------------------------------------------------------------------------------------------------------------------------------------------------------------------------------------------------------------------------------------------------------------------------------------------------------------------------------------------------------------------------------------------------------------------------------------------------------------------------------------------------------------------------------------------------------------------------------------------------------------------------------------------------------------------------------------|---------------------------------------------------------------------------------------------------------------------------------------------------------------------------------------------------------------------------------------------------------------------------------------------------------------------|---------------------------------------------------------------------------------------------------------------------------------------------------------------------------------------------------------------------------------------------------------------------------------------------------------------------------------------------------------------------------------------------------------------------|-------------------------------------------------------------------------------------------------------------------------------------------------------------------------------------------------------------------------------------------------------------------------------------|
| Myocardial Infarction       | INUK.3235.00, INUK.G30..12, INUK.G30..13, INUK.G30..14, INUK.G30..16, INUK.G301.00, INUK.G301200, INUK.G302.00, INUK.G305.00, INUK.G306.00, INUK.G307.00, INUK.G307100, INUK.G308.00, INUK.G30A.00, INUK.G30X.00, INUK.G30y100, INUK.G30y200, INUK.G30z.00, INUK.G31y100, INUK.G35..00, INUK.G351.00, INUK.G363.00, INUK.G365.00, INUK.G501.00, INUK.G5y6.00, INUK.Gyu3100, INUK.Gyu3400, INUK.3233.00, INUK.3234.00, INUK.3236.00, INUK.323Z.00, INUK.G30..00, INUK.G30..11, INUK.G30..15, INUK.G30..17, INUK.G300.00, INUK.G301000, INUK.G301100, INUK.G303.00, INUK.G304.00, INUK.G307000, INUK.G309.00, INUK.G30B.00, INUK.G30X000, INUK.G30y.00, INUK.G30y000, INUK.G30y200, INUK.G350.00, INUK.G353.00, INUK.G35X.00, INUK.G36..00, INUK.G360.00, INUK.G361.00, INUK.G362.00, INUK.G364.00, INUK.G366.00, INUK.Gyu3500, INUK.Gyu3600                                                                                                                                             | I21*, I22*                                                                                                                                                                                                                                                                                                          | Arana A, Margulis AV, Varas-Lorenzo C, Bui CL, Gilsenan A, McQuay LJ, Reynolds M, Rebordosa C, Franks B, de Vogel S, Appenteng K, Perez-Gutthann S. Validation of cardiovascular outcomes and risk factors in the Clinical Practice Research Datalink in the United Kingdom. <i>Pharmacoepidemiol Drug Saf.</i> 2021 Feb;30(2):237-247. doi: 10.1002/pds.5150. Epub 2020 Oct 28. PMID: 33091194; PMCID: PMC7821285. | Metcalfe A, Neudam A, Forde S, et al. Ca definitions for acute myocardial infarction: administrative databases and their impact on in-hospital mortality rates. <i>Health Serv Res.</i> 2013;48(1):290-318. doi:10.1111/hj.126773.2012.01440.x                                      |
| TIA                         | Fyu5500 [X]Other transient cerebral ischaemic attacks + related syndromes<br>G65..00 Transient cerebral ischaemia<br>G65..11 Drop attack<br>G65..12 Transient ischaemic attack<br>G65..13 Vertebro-basilar insufficiency<br>G650.00 Basilar artery syndrome<br>G650.11 Insufficiency - basilar artery<br>G651.00 Vertebral artery syndrome<br>G651000 Vertebro-basilar artery syndrome<br>G652.00 Subclavian steal syndrome<br>G653.00 Carotid artery syndrome hemispheric<br>G654.00 Multiple and bilateral precerebral artery syndromes<br>G656.00 Vertebrobasilar insufficiency<br>G657.00 Carotid territory transient ischaemic attack<br>G65y.00 Other transient cerebral ischaemia<br>G65z.00 Transient cerebral ischaemia NOS<br>G65z000 Impending cerebral ischaemia<br>G65z100 Intermittent cerebral ischaemia<br>G65z200 Transient cerebral ischaemia NOS                                                                                                                    | G45.x*                                                                                                                                                                                                                                                                                                              | Moran GM, Calvert M, Feltham MG, Ryan R, Marshall T. A retrospective cohort study to investigate fatigue, psychological or cognitive impairment after TIA: protocol paper. <i>BMJ Open.</i> 2015;5(4):e008149. Published 2015 May 3. doi:10.1136/bmjopen-2015-008149                                                                                                                                                | Andrade SE, Harrold LR, Tjia J, et al. A systematic review of validated methods for identifying cerebrovascular accident or transient ischemic attack using administrative data. <i>Pharmacoepidemiol Drug Saf.</i> 2012;21 Suppl 1(Suppl 1):100-128. doi:10.1002/pds.2312          |
| Intracranial Hemorrhage     | INUK.G60..00, INUK.G600.00, INUK.G603.00, INUK.G604.00, INUK.G605.00, INUK.G606.00, INUK.G61..00, INUK.G610.00, INUK.G613.00, INUK.G614.00, INUK.G615.00, INUK.G616.00, INUK.G617.00, INUK.G61X100, INUK.G620.00, INUK.Gyu6100, INUK.Gyu6F00, INUK.G601.00, INUK.G602.00, INUK.G60z.00, INUK.G611.00, INUK.G612.00, INUK.G618.00, INUK.G61X.00, INUK.G61X000, INUK.G621.00, INUK.G623.00, INUK.G62z.00, INUK.Gyu6200, INUK.S626.00                                                                                                                                                                                                                                                                                                                                                                                                                                                                                                                                                     | I60.0, I60.1, I60.11, I60.12, I60.2, I60.21, I60.30, I60.32, I60.8, I61, I61.1, I61.4, I61.5, I61.8, I62, I62.0, I62.01, I62.00, I60.01, I60.02, I60.10, I60.20, I60.22, I60.3, I60.31, I60.4, I60.5, I60.50, I60.51, I60.52, I60.6, I60.9, I61.0, I61.1, I61.3, I61.6, I61.9, I62.00, I62.02, I62.03, I62.9, S06.4 | Pasea L, Chung SC, Pujades-Rodriguez M, et al. Bleeding in cardiac patients prescribed antithrombotic drugs: electronic health record phenotyping algorithms, incidence, trends and prognosis. <i>BMC Med.</i> 2019;17(1):206. Published 2019 Nov 20. doi:10.1186/s12916-019-1438-y                                                                                                                                 | Pasea L, Chung SC, Pujades-Rodriguez M, et al. Bleeding in cardiac patients prescribed antithrombotic drugs: electronic health record phenotyping algorithms, incidence, trends and prognosis. <i>BMC Med.</i> 2019;17(1):206. Published 2019 Nov 20. doi:10.1186/s12916-019-1438-y |
| Gastrointestinal Hemorrhage | INUK.196B.00, INUK.19E6.00, INUK.4737.11, INUK.4A23.00, INUK.4A23.11, INUK.4A5..00, INUK.4A5..11, INUK.4A51.00, INUK.G850.00, INUK.J110100, INUK.J110300, INUK.J111111, INUK.J121111, INUK.J121300, INUK.J12y300, INUK.J12yy00, INUK.J130300, INUK.J140100, INUK.J150000, INUK.J573.00, INUK.J573000, INUK.J68..00, INUK.J680.00, INUK.J680.11, INUK.J681.00, INUK.J681.11, INUK.J681.12, INUK.J681.13, INUK.J68z000, INUK.J68z100, INUK.SE22300, INUK.196C.00, INUK.19E4.12, INUK.19E6.11, INUK.479..11, INUK.4A5Z.00, INUK.7619100, INUK.G852000, INUK.J10y000, INUK.J110111, INUK.J111100, INUK.J111300, INUK.J11y100, INUK.J11yy00, INUK.J120100, INUK.J120300, INUK.J121100, INUK.J12y100, INUK.J130100, INUK.J131100, INUK.J13y100, INUK.J13y300, INUK.J14y100, INUK.J510900, INUK.J573011, INUK.J573012, INUK.J573100, INUK.J573z00, INUK.J68z.00, INUK.J68z.11, INUK.J68z200, INUK.J68z200, INUK.SE23111, INUK.1994.00, INUK.1994.11, INUK.1995.00, INUK.4762.00, INUK.4762.11 | I85.01, K25.0, K25.2, K25.4, K25.6, K26.0, K26.2, K26.4, K26.6, K27.0, K27.2, K27.4, K27.6, K28.0, K28.2, K28.4, K29.01, K62.5, K66.1, K92.0, K92.2, K92.1                                                                                                                                                          | Pasea L, Chung SC, Pujades-Rodriguez M, et al. Bleeding in cardiac patients prescribed antithrombotic drugs: electronic health record phenotyping algorithms, incidence, trends and prognosis. <i>BMC Med.</i> 2019;17(1):206. Published 2019 Nov 20. doi:10.1186/s12916-019-1438-y                                                                                                                                 | Pasea L, Chung SC, Pujades-Rodriguez M, et al. Bleeding in cardiac patients prescribed antithrombotic drugs: electronic health record phenotyping algorithms, incidence, trends and prognosis. <i>BMC Med.</i> 2019;17(1):206. Published 2019 Nov 20. doi:10.1186/s12916-019-1438-y |

|                             |                                                                                                                                                                                                                                                                                                                                                                                                                                                                                                                                                                                                                                                                                                                                                                                                                                                                                                                                                                                                                                                                                                                                                                                                                                                                                                                                                                                                                                                                                                                                                                                                                                                                                                                                                                                                                                                                                                                                                                                                                                                                                                                                     |                                                                                                                                                                                                                                                                                                                                                                                                                                                                                                                                                                                                                                                                         |                                                                                                                                                                                                                                                                             |                                                                                                                                                                                                                                                                                                                                     |
|-----------------------------|-------------------------------------------------------------------------------------------------------------------------------------------------------------------------------------------------------------------------------------------------------------------------------------------------------------------------------------------------------------------------------------------------------------------------------------------------------------------------------------------------------------------------------------------------------------------------------------------------------------------------------------------------------------------------------------------------------------------------------------------------------------------------------------------------------------------------------------------------------------------------------------------------------------------------------------------------------------------------------------------------------------------------------------------------------------------------------------------------------------------------------------------------------------------------------------------------------------------------------------------------------------------------------------------------------------------------------------------------------------------------------------------------------------------------------------------------------------------------------------------------------------------------------------------------------------------------------------------------------------------------------------------------------------------------------------------------------------------------------------------------------------------------------------------------------------------------------------------------------------------------------------------------------------------------------------------------------------------------------------------------------------------------------------------------------------------------------------------------------------------------------------|-------------------------------------------------------------------------------------------------------------------------------------------------------------------------------------------------------------------------------------------------------------------------------------------------------------------------------------------------------------------------------------------------------------------------------------------------------------------------------------------------------------------------------------------------------------------------------------------------------------------------------------------------------------------------|-----------------------------------------------------------------------------------------------------------------------------------------------------------------------------------------------------------------------------------------------------------------------------|-------------------------------------------------------------------------------------------------------------------------------------------------------------------------------------------------------------------------------------------------------------------------------------------------------------------------------------|
| Urogenital Hemorrhage       | INUK.1A45.00, INUK.K167.00, INUK.K197.00, INUK.K197000, INUK.K197300, INUK.K19y411, INUK.K221100, INUK.K275200, INUK.K56y100, INUK.K575.00, INUK.K59y00, INUK.K5E0.00, INUK.K5Ez.00, INUK.K16y200, INUK.K197100, INUK.K197400, INUK.K19y400, INUK.K275100, INUK.K286100, INUK.K286400, INUK.K286v00, INUK.K286w00, INUK.K537.00, INUK.K55y300, INUK.K566.00, INUK.K59yx00, INUK.K5E.00, INUK.K5E1.00, INUK.K5E2.00, INUK.Kyu9D00, INUK.1584.00                                                                                                                                                                                                                                                                                                                                                                                                                                                                                                                                                                                                                                                                                                                                                                                                                                                                                                                                                                                                                                                                                                                                                                                                                                                                                                                                                                                                                                                                                                                                                                                                                                                                                      | N02, N02.0, N02.1, N02.2, N02.3, N02.4, N02.5, N02.6, N02.7, N02.8, N02.9, N02.A, N93, N93.0, N93.1, N93.8, N93.9, R31, R31.0, R31.1, R31.2, R31.21, R31.29, R31.9, N42.1, N83.6, N83.7, N85.7, N89.7, N92.1, N95.0                                                                                                                                                                                                                                                                                                                                                                                                                                                     | Pasea L, Chung SC, Pujades-Rodriguez M et al. Bleeding in cardiac patients prescribed antithrombotic drugs: electronic health record phenotyping algorithms, incidence, trends and prognosis. BMC Med. 2019;17(1):206. Published 2019 Nov 20. doi:10.1186/s12916-019-1438-y | Pasea L, Chung SC, Pujades-Rodriguez M et al. Bleeding in cardiac patients prescribed antithrombotic drugs: electronic health record phenotyping algorithms, incidence, trends and prognosis. BMC Med. 2019;17(1):206. Published 2019 Nov 20. doi:10.1186/s12916-019-1438-y                                                         |
| Major Bleeding Events       | See "Intracranial Hemorrhage", "Gastrointestinal Hemorrhage", and "Major Bleeding Events" above                                                                                                                                                                                                                                                                                                                                                                                                                                                                                                                                                                                                                                                                                                                                                                                                                                                                                                                                                                                                                                                                                                                                                                                                                                                                                                                                                                                                                                                                                                                                                                                                                                                                                                                                                                                                                                                                                                                                                                                                                                     | See "Intracranial Hemorrhage", "Gastrointestinal Hemorrhage", and "Major Bleeding Events" above                                                                                                                                                                                                                                                                                                                                                                                                                                                                                                                                                                         |                                                                                                                                                                                                                                                                             |                                                                                                                                                                                                                                                                                                                                     |
| Angina                      | INUK.G311.11, INUK.G311.13, INUK.G311.14, INUK.G311100, INUK.G311200, INUK.G311300, INUK.G311400, INUK.G33.00, INUK.G330.00, INUK.G330000, INUK.G330z00, INUK.G331.00, INUK.G331.11, INUK.G33z.00, INUK.G33z300, INUK.G33z500, INUK.G33z600, INUK.G33z700, INUK.G33z00, INUK.Gyu3000                                                                                                                                                                                                                                                                                                                                                                                                                                                                                                                                                                                                                                                                                                                                                                                                                                                                                                                                                                                                                                                                                                                                                                                                                                                                                                                                                                                                                                                                                                                                                                                                                                                                                                                                                                                                                                                | I20.0, I20.1, I20.8, I20.9, I25.110, I25.700, I25.710, I25.750, I25.760, I25.790, I20, I23.7, I25.720, I25.730                                                                                                                                                                                                                                                                                                                                                                                                                                                                                                                                                          |                                                                                                                                                                                                                                                                             |                                                                                                                                                                                                                                                                                                                                     |
| <b>Covariate Conditions</b> |                                                                                                                                                                                                                                                                                                                                                                                                                                                                                                                                                                                                                                                                                                                                                                                                                                                                                                                                                                                                                                                                                                                                                                                                                                                                                                                                                                                                                                                                                                                                                                                                                                                                                                                                                                                                                                                                                                                                                                                                                                                                                                                                     |                                                                                                                                                                                                                                                                                                                                                                                                                                                                                                                                                                                                                                                                         |                                                                                                                                                                                                                                                                             |                                                                                                                                                                                                                                                                                                                                     |
| Acute Kidney Injury         | INUK.K04.12, INUK.14D8.00, INUK.K04C.00, INUK.K04D.00, INUK.K04E.00, INUK.K04.00, INUK.K04.11, INUK.K043000, INUK.K043100, INUK.K043200, INUK.K043300, INUK.K043400, INUK.K044.00, INUK.K045.00, INUK.K046.00, INUK.K046000, INUK.K046100, INUK.K047.00, INUK.K048.00, INUK.K049.00, INUK.K04A.00, INUK.K04B.00, INUK.K04y.00, INUK.K04z.00, INUK.Kyu2000, INUK.SK08.00                                                                                                                                                                                                                                                                                                                                                                                                                                                                                                                                                                                                                                                                                                                                                                                                                                                                                                                                                                                                                                                                                                                                                                                                                                                                                                                                                                                                                                                                                                                                                                                                                                                                                                                                                             | N17*                                                                                                                                                                                                                                                                                                                                                                                                                                                                                                                                                                                                                                                                    |                                                                                                                                                                                                                                                                             | Tominson, L.A., Riding, A.M., Payne, R.A et al. The accuracy of diagnostic coding for acute kidney injury in England – a single centre study. BMC Nephrol 14, 58 (2013). <a href="https://doi.org/10.1186/1471-2369-14-58">https://doi.org/10.1186/1471-2369-14-58</a>                                                              |
| Anemia                      | INUK.1453.00, INUK.1454.00, INUK.2C2.00, INUK.B937000, INUK.B937200, INUK.B937300, INUK.B937600, INUK.B937700, INUK.B937800, INUK.BBmA.00, INUK.BBmL.00, INUK.D0.11, INUK.D0.12, INUK.D00.12, INUK.D000.00, INUK.D000.11, INUK.D00y.00, INUK.D00y200, INUK.D00z.00, INUK.D00z200, INUK.D01.00, INUK.D010.11, INUK.D011.11, INUK.D011z00, INUK.D012000, INUK.D012111, INUK.D012500, INUK.D013000, INUK.D013200, INUK.D014200, INUK.D01y.00, INUK.D01y011, INUK.D01y012, INUK.D01y00, INUK.D01z.11, INUK.D01z000, INUK.D0y.00, INUK.D102000, INUK.D102200, INUK.D102y00, INUK.D102z00, INUK.D103.00, INUK.D103000, INUK.D103100, INUK.D104.12, INUK.D106.00, INUK.D106100, INUK.D106300, INUK.D106400, INUK.D106z00, INUK.D10y200, INUK.D11.00, INUK.D110.00, INUK.D110000, INUK.D110100, INUK.D110200, INUK.D110400, INUK.D111.00, INUK.D111000, INUK.D111100, INUK.D111400, INUK.D111500, INUK.D111y00, INUK.D111z00, INUK.D112z12, INUK.D1y.00, INUK.D1z.00, INUK.D200.00, INUK.D200011, INUK.D200100, INUK.D201.11, INUK.D201000, INUK.D201100, INUK.D201111, INUK.D201200, INUK.D201300, INUK.D201311, INUK.D201700, INUK.D201z00, INUK.D204.00, INUK.D20z.00, INUK.D21.00, INUK.D210100, INUK.D210300, INUK.D210400, INUK.D211.00, INUK.D212.00, INUK.D213.00, INUK.D215.00, INUK.D21y.00, INUK.D21y000, INUK.D21y011, INUK.D21z.00, INUK.D21z.12, INUK.D21z.13, INUK.D2z.00, INUK.D41yz11, INUK.Dyu0.00, INUK.Dyu0000, INUK.Dyu0100, INUK.Dyu0200, INUK.Dyu0300, INUK.Dyu0400, INUK.Dyu1.00, INUK.Dyu1000, INUK.Dyu1400, INUK.Dyu1700, INUK.Dyu2100, INUK.Dyu2200, INUK.Dyu2400, INUK.F381500, INUK.145.11, INUK.1451.00, INUK.1452.00, INUK.1458.00, INUK.2C2Z.00, INUK.B937100, INUK.B937X00, INUK.BBMA.00, INUK.ByuHCO0, INUK.D0.00, INUK.D00.00, INUK.D00.11, INUK.D000.12, INUK.D001.00, INUK.D00y100, INUK.D00z000, INUK.D00z100, INUK.D00z200, INUK.D01.11, INUK.D010.00, INUK.D010.12, INUK.D011.00, INUK.D011000, INUK.D011013, INUK.D011100, INUK.D011X00, INUK.D012.00, INUK.D012.11, INUK.D012100, INUK.D012112, INUK.D012200, INUK.D012300, INUK.D012400, INUK.D012z00, INUK.D013.00, INUK.D014.00, INUK.D014000, | D50.0, D50.1, D50.8, D50.9, D51.0, D51.1, D51.2, D51.3, D51.8, D51.9, D52.0, D52.1, D52.8, D52.9, D53.0, D53.1, D53.2, D53.8, D53.9, D55.0, D55.1, D55.2, D55.3, D55.8, D55.9, D56.0, D56.1, D56.2, D56.3, D56.4, D56.5, D56.8, D56.9, D58.0, D58.1, D58.2, D58.8, D58.9, D59.0, D59.1, D59.2, D59.3, D59.4, D59.5, D59.6, D59.8, D59.9, D60.0, D60.1, D60.8, D60.9, D61.01, D61.09, D61.1, D61.2, D61.810, D61.811, D61.818, D61.82, D61.89, D61.9, D63, D63.1, D63.8, D64.0, D64.1, D64.2, D64.3, D64.4, D64.89, D64.9, D67.00, D67.01, D67.02, D67.1, D67.20, D67.211, D67.212, D67.219, D67.3, D67.40, D67.411, D67.412, D67.419, D67.80, D67.811, D67.812, D67.819 |                                                                                                                                                                                                                                                                             | CCS 0059, Deficiency and other anemia<br>CCS 0061, Sickle cell anemia<br>Elixhauser A, Steiner C, Palmer L. Clinical Classifications Software (CCS), 2018. U.S. Agency for Healthcare Research and Quality. Available <a href="https://www.hcup-us.ahrq.gov/tools_software.jsp">https://www.hcup-us.ahrq.gov/tools_software.jsp</a> |

|                        |                                                                                                                                                                                                                                                                                                                                                                                                                                                                                                                                                                                                                                                                                                                                                                                                                                                                                                                                                                                                                                                                                                                                                                                                                                                                                                                                                                                                                                                                                                                                                                                                                                                                                                                                                                                                                                                                                                                                                                                                                                                                                                                                                   |                                                                |                                                                                                                                                                                                                                                        |                                                                                                                                                                                                                                                                                             |
|------------------------|---------------------------------------------------------------------------------------------------------------------------------------------------------------------------------------------------------------------------------------------------------------------------------------------------------------------------------------------------------------------------------------------------------------------------------------------------------------------------------------------------------------------------------------------------------------------------------------------------------------------------------------------------------------------------------------------------------------------------------------------------------------------------------------------------------------------------------------------------------------------------------------------------------------------------------------------------------------------------------------------------------------------------------------------------------------------------------------------------------------------------------------------------------------------------------------------------------------------------------------------------------------------------------------------------------------------------------------------------------------------------------------------------------------------------------------------------------------------------------------------------------------------------------------------------------------------------------------------------------------------------------------------------------------------------------------------------------------------------------------------------------------------------------------------------------------------------------------------------------------------------------------------------------------------------------------------------------------------------------------------------------------------------------------------------------------------------------------------------------------------------------------------------|----------------------------------------------------------------|--------------------------------------------------------------------------------------------------------------------------------------------------------------------------------------------------------------------------------------------------------|---------------------------------------------------------------------------------------------------------------------------------------------------------------------------------------------------------------------------------------------------------------------------------------------|
| Asthma or COPD         | <p>INUK.173d.00, INUK.1780.00, INUK.1781.00, INUK.1782.00, INUK.1783.00, INUK.1785.00, INUK.1786.00, INUK.1787.00, INUK.178A.00, INUK.178B.00, INUK.663N000, INUK.663N100, INUK.663O000, INUK.663P.00, INUK.663P100, INUK.663U.00, INUK.663V000, INUK.663V200, INUK.663V300, INUK.663e100, INUK.663j.00, INUK.663n.00, INUK.663r.00, INUK.663s.00, INUK.663t.00, INUK.663w.00, INUK.663x.00, INUK.66Ys.00, INUK.H312000, INUK.H33.00, INUK.H330.00, INUK.H330.11, INUK.H330.14, INUK.H330011, INUK.H331.00, INUK.H331.11, INUK.H331111, INUK.H335.00, INUK.H33z011, INUK.H33z200, INUK.H33zz00, INUK.H33zz12, INUK.H35y600, INUK.H35y700, INUK.14B4.00, INUK.1784.00, INUK.1788.00, INUK.1789.00, INUK.1O2.00, INUK.663J.00, INUK.663N.00, INUK.663N200, INUK.663P000, INUK.663P200, INUK.663R.00, INUK.663S.00, INUK.663T.00, INUK.663V100, INUK.663W.00, INUK.663X.00, INUK.663e000, INUK.663f.00, INUK.663p.00, INUK.663u.00, INUK.66Ys.00, INUK.8H2P.00, INUK.H33.11, INUK.H330.12, INUK.H330.13, INUK.H330111, INUK.H330z00, INUK.H331z00, INUK.H332.00, INUK.H333.00, INUK.H334.00, INUK.H33z.00, INUK.H33z100, INUK.H33z111, INUK.H33z11, INUK.H47y000, INUK.173c.00, INUK.66YQ.00, INUK.66Yq.00, INUK.173A.00, INUK.663H.00, INUK.663Q.00, INUK.663Q.00, INUK.663V.00, INUK.663h.00, INUK.663a.00, INUK.663q.00, INUK.663v.00, INUK.66YP.00, INUK.66Yr.00, INUK.66Yp.00, INUK.66Yr.00, INUK.H330000, INUK.H330100, INUK.H331000, INUK.H331100, INUK.H33z000, INUK.66YG.00, INUK.66YH.00, INUK.H3...00, INUK.H310.00, INUK.H310z00, INUK.H311100, INUK.H311z00, INUK.H312.00, INUK.H312100, INUK.H313.00, INUK.H31y.00, INUK.H31yz00, INUK.H32.00, INUK.H320300, INUK.H320z00, INUK.H32y111, INUK.H32y200, INUK.H32yz00, INUK.H32z.00, INUK.H37.00, INUK.H39.00, INUK.H3B.00, INUK.H3y.11, INUK.H581.00, INUK.Hyu3000, INUK.J650200, INUK.K101400, INUK.14B3.12, INUK.66Yg.00, INUK.66Yh.00, INUK.H31.00, INUK.H311.00, INUK.H311000, INUK.H312z00, INUK.H31z.00, INUK.H320.00, INUK.H320000, INUK.H320100, INUK.H320200, INUK.H321.00, INUK.H322.00, INUK.H32y.00, INUK.H32y000, INUK.H32y100, INUK.H36.00, INUK.H38.00, INUK.H3z.11,</p> | J45*, J46*, J82.83, J41*, J42*, J43*, J44*                     |                                                                                                                                                                                                                                                        | <p>Khakban A, FitzGerald JM, Tavakoli H, Lynd L, Ehteshami-Afshar S, Sadatsafavi. Extent, trends, and determinants of controller/reliever balance in mild asthma: 14-year population-based study. <i>Respir Res.</i> 2019;20(1):44. Published 2019 Feb 2. doi:10.1186/s12931-019-1007-0</p> |
| Chronic Kidney Disease | <p>INUK.K05..13, INUK.K05.00, INUK.D215000, INUK.K0E.00, INUK.Kyu2100, INUK.1Z1.00, INUK.1Z10.00, INUK.1Z11.00, INUK.1Z12.00, INUK.1Z13.00, INUK.1Z14.00, INUK.1Z15.00, INUK.1Z16.00, INUK.1Z17.00, INUK.1Z18.00, INUK.1Z19.00, INUK.1Z1A.00, INUK.1Z1B.00, INUK.1Z1C.00, INUK.1Z1D.00, INUK.1Z1E.00, INUK.1Z1F.00, INUK.1Z1G.00, INUK.1Z1H.00, INUK.1Z1J.00, INUK.1Z1K.00, INUK.1Z1L.00, INUK.K051.00, INUK.K052.00, INUK.K053.00, INUK.K054.00, INUK.K055.00, INUK.1Z17.11, INUK.1Z18.11, INUK.1Z19.11, INUK.1Z1A.11, INUK.1Z1B.11, INUK.1Z1C.11, INUK.1Z1D.11, INUK.1Z1E.11, INUK.1Z1F.11, INUK.1Z1G.11, INUK.1Z1H.11, INUK.1Z1J.11, INUK.1Z1K.11, INUK.1Z1L.11, INUK.1Z1M.00, INUK.1Z1N.00, INUK.1Z1P.00, INUK.1Z1Q.00, INUK.1Z1R.00, INUK.1Z1S.00, INUK.1Z1T.00, INUK.1Z1V.00, INUK.1Z1W.00, INUK.1Z1X.00, INUK.1Z1Y.00, INUK.1Z1Z.00, INUK.1Z1a.00, INUK.1Z1b.00, INUK.1Z1c.00, INUK.1Z1d.00, INUK.1Z1e.00, INUK.1Z1f.00, INUK.66i.00, INUK.6AA.00, INUK.8L50.00, INUK.D215.00, INUK.G22.11, INUK.K05.11, INUK.K06.00, INUK.K06.11, INUK.K060.00, INUK.K08.00, INUK.K08z.00, INUK.K0D.00, INUK.SP08300</p>                                                                                                                                                                                                                                                                                                                                                                                                                                                                                                                                                                                                                                                                                                                                                                                                                                                                                                                                                                                                                                  | N18, N18.1, N18.2, N18.3, N18.30, N18.31, N18.32, N18.5, N18.9 | Denburg MR, Haynes K, Shults J, Lewis JD, Leonard MB. Validation of The Health Improvement Network (THIN) database for epidemiologic studies of chronic kidney disease. <i>Pharmacoepidemiol Drug Saf.</i> 2011;20(11):1138-1149. doi:10.1002/pds.2203 |                                                                                                                                                                                                                                                                                             |



|               |                                                                                                                                                                                                                                                                                                                                                                                                                                                                                                                                                                                                                                                                                                                                                                                                                                                                                                                                                                                 |                              |                                                                                                                                                                                                                                                                                                                                                    |                                                                                                                                                                                                                                                                                                                                                                                                                                                                                                                                                                              |
|---------------|---------------------------------------------------------------------------------------------------------------------------------------------------------------------------------------------------------------------------------------------------------------------------------------------------------------------------------------------------------------------------------------------------------------------------------------------------------------------------------------------------------------------------------------------------------------------------------------------------------------------------------------------------------------------------------------------------------------------------------------------------------------------------------------------------------------------------------------------------------------------------------------------------------------------------------------------------------------------------------|------------------------------|----------------------------------------------------------------------------------------------------------------------------------------------------------------------------------------------------------------------------------------------------------------------------------------------------------------------------------------------------|------------------------------------------------------------------------------------------------------------------------------------------------------------------------------------------------------------------------------------------------------------------------------------------------------------------------------------------------------------------------------------------------------------------------------------------------------------------------------------------------------------------------------------------------------------------------------|
| Heart Failure | <p>INUK.G58..00, INUK.1O1..00, INUK.G580.00, INUK.G580.12, INUK.G580000, INUK.G580100, INUK.G580400, INUK.G582.00, INUK.G583.00, INUK.G583.11, INUK.G583.12, INUK.G585.00, INUK.G58z.00, INUK.G5y4z00, INUK.SP11111, INUK.G58..11, INUK.G580.11, INUK.G580200, INUK.G580300, INUK.G58z.12, INUK.L09y200, INUK.Q48y100, INUK.G232.00, INUK.G1yz100, INUK.G580.13, INUK.G580.14, INUK.G581.00, INUK.G581000, INUK.G584.00</p>                                                                                                                                                                                                                                                                                                                                                                                                                                                                                                                                                     | I50*                         |                                                                                                                                                                                                                                                                                                                                                    | <p>Frolova N, Bakal JA, McAlister FA, Rowe BH, Quan H, Kaul P, Ezekowitz JA. Assessing the use of international classification of diseases-10th revision codes from the emergency department for the identification of acute heart failure. <i>JACC Heart Fail.</i> 2015 May;3(5):386-391. doi: 10.1016/j.jchf.2014.11.010. PMID: 25951759.</p> <p>Delekta J, Hansen SM, AlZuhairi KS, Bork CS, Joensen AM. The validity of the diagnosis of heart failure (I50.0-I50.9) in the Danish National Patient Register. <i>Dan Med J.</i> 2018 Apr;65(4):A5470. PMID: 29619924</p> |
| Hypertension  | <p>INUK.G2...11, INUK.G2...00, INUK.G2...11, INUK.G20..00, INUK.G20..12, INUK.G200.00, INUK.G203.00, INUK.G20z.00, INUK.G21..00, INUK.G211.00, INUK.G211000, INUK.G211100, INUK.G211z00, INUK.G21z000, INUK.G21z011, INUK.G21z100, INUK.G22..00, INUK.G220.00, INUK.G222.00, INUK.G232.00, INUK.G240z00, INUK.G241.00, INUK.G24z.00, INUK.G26..11, INUK.G27..00, INUK.G28..00, INUK.G2y..00, INUK.G41y000, INUK.G41y100, INUK.Gyu2.00, INUK.Gyu2000, INUK.Gyu2100, INUK.J17B.00, INUK.G201.00, INUK.G202.00, INUK.G20z.11, INUK.G210.00, INUK.G210000, INUK.G210100, INUK.G210z00, INUK.G21z.00, INUK.G21zz00, INUK.G221.00, INUK.G22z.00, INUK.G22z.11, INUK.G23..00, INUK.G230.00, INUK.G231.00, INUK.G233.00, INUK.G23z.00, INUK.G24..00, INUK.G240.00, INUK.G240000, INUK.G241000, INUK.G241z00, INUK.G244.00, INUK.G24z000, INUK.G24z100, INUK.G24zz00, INUK.G25..00, INUK.G25..11, INUK.G26..00, INUK.G2z..00, INUK.G410.00, INUK.G672.11, INUK.G8y3.00, INUK.J623.00</p> | I10*, I11*, I12*, I13*, I15* | <p>Peng M, Chen G, Kaplan GG, Lix LM, Drummond N, Lucyk K, Garies S, Lowerison M, Weibe S, Quan H. Methods defining hypertension in electronic medical records: validation against national survey data. <i>J Public Health (Oxf).</i> 2016 Sep;38(3):e392-e399. doi: 10.1093/pubmed/fdv155. Epub 2015 Nov. PMID: 26547088; PMCID: PMC5072168.</p> | <p>Tu K, Campbell NR, Chen ZL, Cauch-Dudek KJ, McAlister FA. Accuracy of administrative databases in identifying patients with hypertension. <i>Open Med.</i> 2007;1(1):e18-e26. Published 2007 Apr 14</p>                                                                                                                                                                                                                                                                                                                                                                   |



|                     |                                                                                                                                                                                                                                                                                                                                                                                                                                                                                                                                                                                                                                                                                                                                                                                                                                                                                                                                                                                                                                                                                                                                                                                                                                                                                                                                                                                                                                                                                                                                                                                                                                                                                                                                                                                                                                                                                                                                                                                                                                                                                                                                                                                   |                                                                                                                                                                                                                                                                                                                                                                                                                                                                                                                                                                                                                                                                                                                                                                                                                                                                                                                                                                                                                                                                                                                                                                                                                                                                                                                                                                                                                                                                                                                                                                                                                                                                                                                                                                                                                                                                                                                                                                                                                                                                          |  |  |
|---------------------|-----------------------------------------------------------------------------------------------------------------------------------------------------------------------------------------------------------------------------------------------------------------------------------------------------------------------------------------------------------------------------------------------------------------------------------------------------------------------------------------------------------------------------------------------------------------------------------------------------------------------------------------------------------------------------------------------------------------------------------------------------------------------------------------------------------------------------------------------------------------------------------------------------------------------------------------------------------------------------------------------------------------------------------------------------------------------------------------------------------------------------------------------------------------------------------------------------------------------------------------------------------------------------------------------------------------------------------------------------------------------------------------------------------------------------------------------------------------------------------------------------------------------------------------------------------------------------------------------------------------------------------------------------------------------------------------------------------------------------------------------------------------------------------------------------------------------------------------------------------------------------------------------------------------------------------------------------------------------------------------------------------------------------------------------------------------------------------------------------------------------------------------------------------------------------------|--------------------------------------------------------------------------------------------------------------------------------------------------------------------------------------------------------------------------------------------------------------------------------------------------------------------------------------------------------------------------------------------------------------------------------------------------------------------------------------------------------------------------------------------------------------------------------------------------------------------------------------------------------------------------------------------------------------------------------------------------------------------------------------------------------------------------------------------------------------------------------------------------------------------------------------------------------------------------------------------------------------------------------------------------------------------------------------------------------------------------------------------------------------------------------------------------------------------------------------------------------------------------------------------------------------------------------------------------------------------------------------------------------------------------------------------------------------------------------------------------------------------------------------------------------------------------------------------------------------------------------------------------------------------------------------------------------------------------------------------------------------------------------------------------------------------------------------------------------------------------------------------------------------------------------------------------------------------------------------------------------------------------------------------------------------------------|--|--|
| Malignant Neoplasms | <p>INUK.142E.00, INUK.142F.00, INUK.142G.00, INUK.B0...11, INUK.B00...00, INUK.B00...11, INUK.B000100, INUK.B000z00, INUK.B0002.00, INUK.B0002000, INUK.B0003100, INUK.B0003300, INUK.B0004100, INUK.B0006.00, INUK.B0007.00, INUK.B000z00, INUK.B010.00, INUK.B010000, INUK.B010z00, INUK.B011000, INUK.B011100, INUK.B012.00, INUK.B015.00, INUK.B01y.00, INUK.B02...00, INUK.B022.00, INUK.B03...00, INUK.B030.00, INUK.B031.00, INUK.B03y.00, INUK.B04y.00, INUK.B04z.00, INUK.B05...00, INUK.B050.11, INUK.B051z00, INUK.B053.00, INUK.B054.00, INUK.B055.00, INUK.B055100, INUK.B055z00, INUK.B05y.00, INUK.B05z000, INUK.B06...00, INUK.B060.00, INUK.B060100, INUK.B060z00, INUK.B062.00, INUK.B062000, INUK.B062300, INUK.B064000, INUK.B065.00, INUK.B066.00, INUK.B06y.00, INUK.B06yz00, INUK.B06z.00, INUK.B071100, INUK.B071z00, INUK.B072000, INUK.B072100, INUK.B074.00, INUK.B07y.00, INUK.B07z.00, INUK.B08...00, INUK.B0z1.00, INUK.B1...00, INUK.B10...00, INUK.B100.00, INUK.B101.00, INUK.B102.00, INUK.B104.00, INUK.B105.00, INUK.B106.00, INUK.B10y.00, INUK.B10z.00, INUK.B110.00, INUK.B110000, INUK.B110z00, INUK.B111000, INUK.B111100, INUK.B111z00, INUK.B112.00, INUK.B113.00, INUK.B11y.00, INUK.B11y100, INUK.B11yz00, INUK.B124.00, INUK.B12y.00, INUK.B13...00, INUK.B130.00, INUK.B131.00, INUK.B132.00, INUK.B136.00, INUK.B13y.00, INUK.B13z.00, INUK.B140.00, INUK.B142.00, INUK.B142000, INUK.B143.00, INUK.B14z.00, INUK.B15...00, INUK.B150.00, INUK.B150z00, INUK.B151000, INUK.B151z00, INUK.B160.00, INUK.B161100, INUK.B161300, INUK.B161z00, INUK.B16y.00, INUK.B17...00, INUK.B170.00, INUK.B171.00, INUK.B173.00, INUK.B175.00, INUK.B180.00, INUK.B180100, INUK.B180200, INUK.B180z00, INUK.B18y.00, INUK.B18y300, INUK.B18y600, INUK.B18yz00, INUK.B18z.00, INUK.B1z0.00, INUK.B1z1.00, INUK.B1z2.00, INUK.B200000, INUK.B200200, INUK.B200300, INUK.B200z00, INUK.B201000, INUK.B201100, INUK.B201200, INUK.B203.00, INUK.B206.00, INUK.B210.00, INUK.B213.00, INUK.B213000, INUK.B213100, INUK.B213300, INUK.B215.00, INUK.B21y.00, INUK.B22...00, INUK.B220.00, INUK.B220000, INUK.B220100, INUK.B221.00, INUK.B221000,</p> | <p>C00, C00.0, C00.1, C00.2, C00.3, C00.4, C00.5, C00.6, C00.8, C00.9, C01, C02, C02.0, C02.1, C02.2, C02.3, C02.8, C02.9, C03, C03.0, C03.1, C03.9, C04, C04.0, C04.8, C04.9, C05, C05.0, C05.1, C05.2, C05.8, C05.9, C06.0, C06.1, C06.2, C06.8, C06.80, C06.89, C06.9, C07, C08, C08.0, C08.1, C08.9, C09, C09.0, C09.1, C09.8, C09.9, C10, C10.0, C10.1, C10.2, C10.3, C10.4, C10.8, C10.9, C11.0, C11.1, C11.2, C11.3, C11.8, C11.9, I82.C11, C12, I82.C12, C13, C13.0, C13.1, C13.2, C13.8, C13.9, I82.C13, C14, C14.0, C14.2, C14.8, C15, C15.3, C15.4, C15.5, C15.9, C16, C16.0, C16.1, C16.2, C16.3, C16.4, C16.5, C16.6, C16.8, C16.9, C17, C17.0, C17.1, C17.2, C17.3, C17.8, C17.9, C18, C18.0, C18.1, C18.2, C18.3, C18.4, C18.5, C18.6, C18.7, C18.8, C18.9, C19, I82.C19, C20, C21.0, C21.1, C21.2, C21.8, I82.C21, C22, C22.0, C22.1, C22.2, C22.3, C22.4, C22.7, C22.8, C22.9, I82.C22, C23, I82.C23, C24, C24.0, C24.1, C24.8, C24.9, C25, C25.0, C25.1, C25.2, C25.3, C25.4, C25.7, C25.8, C25.9, C26, C26.0, C26.1, C26.9, C30, C30.0, C30.1, C31, C31.0, C31.2, C31.3, C31.8, C31.9, C32, C32.0, C32.1, C32.2, C32.3, C32.8, C32.9, C33, C34, C34.0, C34.01, C34.02, C34.1, C34.10, C34.11, C34.12, C34.2, C34.3, C34.30, C34.31, C34.32, C34.8, C34.80, C34.81, C34.82, C34.9, C34.90, C34.91, C34.92, C37, C38, C38.0, C38.1, C38.2, C38.3, C38.4, C38.8, C39, C39.0, C39.9, C40, C40.0, C40.01, C40.02, C40.1, C40.10, C40.11, C40.12, C40.2, C40.20, C40.21, C40.22, C40.3, C40.30, C40.31, C40.32, C40.8, C40.80, C40.81, C40.82, C40.9, C40.90, C40.91, C40.92, C41, C41.0, C41.1, C41.2, C41.3, C41.4, C41.9, C43, C43.0, C43.1, C43.10, C43.11, C43.111, C43.112, C43.12, C43.121, C43.122, C43.2, C43.20, C43.22, C43.3, C43.30, C43.31, C43.39, C43.4, C43.5, C43.51, C43.52, C43.59, C43.6, C43.60, C43.61, C43.62, C43.7, C43.70, C43.71, C43.72, C43.8, C43.9, C44, C44.0, C44.01, C44.02, C44.09, C44.1, C44.10, C44.101, C44.102, C44.1021, C44.1022, C44.109, C44.1091, C44.1092, C44.11, C44.111, C44.112, C44.1121, C44.1122,</p> |  |  |
| Non Major Bleeding  | <p>INUK.14c...00, INUK.14c...11, INUK.16R...00, INUK.1928.00, INUK.1C6...00, INUK.1C6...11, INUK.2BB5.00, INUK.2BB8.00, INUK.2D25.00, INUK.F42y.11, INUK.F42y100, INUK.F42y500, INUK.F436000, INUK.F436100, INUK.F4C7200, INUK.F4K7.00, INUK.FyuH400, INUK.N091.00, INUK.N091000, INUK.N091100, INUK.N091200, INUK.N091500, INUK.N091600, INUK.N091611, INUK.N091711, INUK.N091800, INUK.N091900, INUK.N091B00, INUK.N091C00, INUK.N091K00, INUK.N091L00, INUK.N091M00, INUK.N091N00, INUK.N091Q00, INUK.N091R00, INUK.N091S00, INUK.N091T00, INUK.N091z00, INUK.R048.00, INUK.R063000, INUK.R063100, INUK.Ryu0200, INUK.14C...00, INUK.14C...11, INUK.1C62.00, INUK.1C6Z.00, INUK.2556.00, INUK.2DE7.00, INUK.F42y300, INUK.F42y400, INUK.F436.00, INUK.F436z00, INUK.F4C7100, INUK.F4Ey000, INUK.F4G3200, INUK.F4H4100, INUK.F4K2800, INUK.J017200, INUK.N091211, INUK.N091300, INUK.N091311, INUK.N091400, INUK.N091511, INUK.N091700, INUK.N091A00, INUK.N091D00, INUK.N091E00, INUK.N091F00, INUK.N091G00, INUK.N091H00, INUK.N091J00, INUK.N091P00, INUK.N091U00, INUK.N091V00, INUK.R047.00, INUK.Ryu0700</p>                                                                                                                                                                                                                                                                                                                                                                                                                                                                                                                                                                                                                                                                                                                                                                                                                                                                                                                                                                                                                                                              | <p>R04, R04.1, R04.2, R04.8, R04.81, R04.89, R04.9, H35.6, H35.60, H35.61, H35.62, H35.63, H43.1, H43.10, H43.11, H43.12, H43.13, M25.0, M25.00, M25.01, M25.011, M25.019, M25.02, M25.021, M25.022, M25.029, M25.03, M25.031, M25.032, M25.039, M25.04, M25.041, M25.042, M25.049, M25.05, M25.051, M25.052, M25.059, M25.06, M25.061, M25.062, M25.069, M25.07, M25.071, M25.072, M25.073, M25.074, M25.075, M25.076, M25.08, R04.0</p>                                                                                                                                                                                                                                                                                                                                                                                                                                                                                                                                                                                                                                                                                                                                                                                                                                                                                                                                                                                                                                                                                                                                                                                                                                                                                                                                                                                                                                                                                                                                                                                                                                |  |  |

|                                                               |                                                                                                                                                                                                                                                                                                                                                                                                                                                                                                                                                                                                                                                                                                                                                                                                                                                 |                                                                                                                                                                                                                                                                                                                                                                                                                                                                                                                                                                                                                                                                                                                                                                                                                                                                                                                                                                                                                                                                                                                                                                                                                                                                                                                                                                                                                                                                                                                                                                                                                                                                                                                                                                                                                                                                                    |                                                                                                                                                                                                                                                                        |  |
|---------------------------------------------------------------|-------------------------------------------------------------------------------------------------------------------------------------------------------------------------------------------------------------------------------------------------------------------------------------------------------------------------------------------------------------------------------------------------------------------------------------------------------------------------------------------------------------------------------------------------------------------------------------------------------------------------------------------------------------------------------------------------------------------------------------------------------------------------------------------------------------------------------------------------|------------------------------------------------------------------------------------------------------------------------------------------------------------------------------------------------------------------------------------------------------------------------------------------------------------------------------------------------------------------------------------------------------------------------------------------------------------------------------------------------------------------------------------------------------------------------------------------------------------------------------------------------------------------------------------------------------------------------------------------------------------------------------------------------------------------------------------------------------------------------------------------------------------------------------------------------------------------------------------------------------------------------------------------------------------------------------------------------------------------------------------------------------------------------------------------------------------------------------------------------------------------------------------------------------------------------------------------------------------------------------------------------------------------------------------------------------------------------------------------------------------------------------------------------------------------------------------------------------------------------------------------------------------------------------------------------------------------------------------------------------------------------------------------------------------------------------------------------------------------------------------|------------------------------------------------------------------------------------------------------------------------------------------------------------------------------------------------------------------------------------------------------------------------|--|
| Osteoporosis/Hip Fractures                                    | <p>INUK.14G6.00, INUK.14G9.00, INUK.N330100, INUK.N330200, INUK.N330300, INUK.N330400, INUK.N330500, INUK.N330600, INUK.N330900, INUK.N330A00, INUK.N330B00, INUK.N331400, INUK.N331500, INUK.N331A00, INUK.N331B00, INUK.N331K00, INUK.N331M00, INUK.N331M11, INUK.NyuB000, INUK.NyuB100, INUK.NyuB800, INUK.S30y.11, INUK.14G7.00, INUK.14G8.00, INUK.14GA.00, INUK.14GB.00, INUK.N330.00, INUK.N330000, INUK.N330700, INUK.N330800, INUK.N330C00, INUK.N330D00, INUK.N330z00, INUK.N331.14, INUK.N331200, INUK.N331300, INUK.N331600, INUK.N331800, INUK.N331900, INUK.N331H00, INUK.N331J00, INUK.N331L00, INUK.N374600, INUK.NyuB200, INUK.S30.11</p>                                                                                                                                                                                      | <p>M80, M80.0, M80.00, M80.00XA, M80.00XD, M80.00XG, M80.00XK, M80.00XP, M80.00XS, M80.01, M80.011, M80.011A, M80.011D, M80.011G, M80.011K, M80.011P, M80.011S, M80.012, M80.012A, M80.012D, M80.012G, M80.012K, M80.012P, M80.012S, M80.019, M80.019A, M80.019D, M80.019G, M80.019K, M80.019P, M80.019S, M80.02, M80.021, M80.021A, M80.021D, M80.021G, M80.021K, M80.021P, M80.021S, M80.022, M80.022A, M80.022D, M80.022G, M80.022K, M80.022P, M80.022S, M80.029, M80.029A, M80.029D, M80.029G, M80.029K, M80.029P, M80.029S, M80.03, M80.031, M80.031A, M80.031D, M80.031G, M80.031K, M80.031P, M80.031S, M80.032, M80.032A, M80.032D, M80.032G, M80.032K, M80.032P, M80.032S, M80.039, M80.039A, M80.039D, M80.039G, M80.039K, M80.039P, M80.039S, M80.04, M80.041, M80.041A, M80.041D, M80.041G, M80.041K, M80.041P, M80.041S, M80.042, M80.042A, M80.042D, M80.042G, M80.042K, M80.042P, M80.042S, M80.049, M80.049A, M80.049D, M80.049G, M80.049K, M80.049P, M80.049S, M80.05, M80.051, M80.051A, M80.051D, M80.051G, M80.051K, M80.051P, M80.051S, M80.052, M80.052A, M80.052D, M80.052G, M80.052K, M80.052P, M80.052S, M80.059, M80.059A, M80.059D, M80.059G, M80.059K, M80.059P, M80.059S, M80.06, M80.061, M80.061A, M80.061D, M80.061G, M80.061K, M80.061P, M80.061S, M80.062, M80.062A, M80.062D, M80.062G, M80.062K, M80.062P, M80.062S, M80.069, M80.069A, M80.069D, M80.069G, M80.069K, M80.069P, M80.069S, M80.07, M80.071, M80.071A, M80.071D, M80.071G, M80.071K, M80.071P, M80.071S, M80.072, M80.072A, M80.072D, M80.072G, M80.072K, M80.072P, M80.072S, M80.079, M80.079A, M80.079D, M80.079G, M80.079K, M80.079P, M80.079S, M80.08, M80.08XA, M80.08XD, M80.08XG, M80.08XK, M80.08XP, M80.08XS, M80.0A, M80.0AXA, M80.0AXD, M80.0AXG, M80.0AXK, M80.0AXM, M80.0AXS, M80.8, M80.80, M80.80XA, M80.80XD, M80.80XG, M80.80XK, M80.80XP, M80.80XS, M80.81,</p> |                                                                                                                                                                                                                                                                        |  |
| CHA2DS2 VASc score component: heart failure                   | See "Heart Failure" above                                                                                                                                                                                                                                                                                                                                                                                                                                                                                                                                                                                                                                                                                                                                                                                                                       | See "Heart Failure" above                                                                                                                                                                                                                                                                                                                                                                                                                                                                                                                                                                                                                                                                                                                                                                                                                                                                                                                                                                                                                                                                                                                                                                                                                                                                                                                                                                                                                                                                                                                                                                                                                                                                                                                                                                                                                                                          |                                                                                                                                                                                                                                                                        |  |
| CHA2DS2 VASc score component: thromboembolism                 | <p>INUK.G401.00, INUK.G401.12, INUK.G401000, INUK.G401100, INUK.G402.00, INUK.G80.00, INUK.G800.12, INUK.G800300, INUK.G800400, INUK.G801.00, INUK.G801.11, INUK.G801.12, INUK.G801.13, INUK.G801500, INUK.G801600, INUK.G801700, INUK.G801800, INUK.G801900, INUK.G801A00, INUK.G801B00, INUK.G801C00, INUK.G801D00, INUK.G801E00, INUK.G801F00, INUK.G801G00, INUK.G801H00, INUK.G801J00, INUK.G801z00, INUK.G802.00, INUK.G802000, INUK.G80y.00, INUK.G80y.11, INUK.G80y400, INUK.G80y500, INUK.G80y600, INUK.G80y700, INUK.G80y800, INUK.G80y200, INUK.G80z.00, INUK.G80z100, INUK.G80zz00, INUK.G8z.00, INUK.L096400, INUK.L414.00, INUK.L414.11, INUK.L414.12, INUK.14A8.12, INUK.14A8100, INUK.SP12200, INUK.ZV12800, INUK.ZV12811, INUK.ZV12900, INUK.L413.00, INUK.L413.11, INUK.L413000, INUK.L413100, INUK.L413200, INUK.L413z00</p> | <p>126.01, 126.92, 126.99, 182.402, 182.403, 182.409, 182.492, 182.499, 182.4Y1, 182.4Y2, 182.4Y3, 182.4Z9, 182.502, 182.503, 182.5Y2, 182.5Y9, 182.5Z1, 182.5Z2, 182.621, 182.721, 182.729, 126.02, 126.09, 126.90, 182.491, 182.493, 182.4Y9, 182.4Z1, 182.4Z2, 182.4Z3, 182.501, 182.503, 182.509, 182.509, 182.593, 182.599, 182.5Y1, 182.5Y3, 182.5Z3, 182.5Z9, 182.623, 182.629, 182.723</p>                                                                                                                                                                                                                                                                                                                                                                                                                                                                                                                                                                                                                                                                                                                                                                                                                                                                                                                                                                                                                                                                                                                                                                                                                                                                                                                                                                                                                                                                                 | <p>Ruigómez A, Brobert G, Vora P, García Rodríguez LA. Validation of venous thromboembolism diagnoses in patients receiving rivaroxaban or warfarin in The Health Improvement Network. <i>Pharmacoepidemiol Drug Saf.</i> 2021;30(2):229-236. doi:10.1002/pds.5144</p> |  |
| CHA2DS2 VASc score component: stroke, TIA, or thromboembolism | See "Stroke (Ischemic and Hemorrhagic)", "TIA", and "CHA2DS2 VASc score component: thromboembolism" above                                                                                                                                                                                                                                                                                                                                                                                                                                                                                                                                                                                                                                                                                                                                       | See "Stroke (Ischemic and Hemorrhagic)", "TIA", and "CHA2DS2 VASc score component: thromboembolism" above                                                                                                                                                                                                                                                                                                                                                                                                                                                                                                                                                                                                                                                                                                                                                                                                                                                                                                                                                                                                                                                                                                                                                                                                                                                                                                                                                                                                                                                                                                                                                                                                                                                                                                                                                                          |                                                                                                                                                                                                                                                                        |  |

|                                                                                |                                                                                                                                                                        |                                                                                                                                                                                                                                                                                                                                                                                                                                                                                                                                                                                                                                                                                                                                                                                                                                                                                                                                                                                                                                                                                                                                                                                                                                                                                                                                                                                                                                                                                                                                                                                                                                                                                                                                                                                                                                                                                                                                                                                                                                                                                                                                                                                                                                                                                                                                                         |                                |                                                                                                                                                                                                                                                             |
|--------------------------------------------------------------------------------|------------------------------------------------------------------------------------------------------------------------------------------------------------------------|---------------------------------------------------------------------------------------------------------------------------------------------------------------------------------------------------------------------------------------------------------------------------------------------------------------------------------------------------------------------------------------------------------------------------------------------------------------------------------------------------------------------------------------------------------------------------------------------------------------------------------------------------------------------------------------------------------------------------------------------------------------------------------------------------------------------------------------------------------------------------------------------------------------------------------------------------------------------------------------------------------------------------------------------------------------------------------------------------------------------------------------------------------------------------------------------------------------------------------------------------------------------------------------------------------------------------------------------------------------------------------------------------------------------------------------------------------------------------------------------------------------------------------------------------------------------------------------------------------------------------------------------------------------------------------------------------------------------------------------------------------------------------------------------------------------------------------------------------------------------------------------------------------------------------------------------------------------------------------------------------------------------------------------------------------------------------------------------------------------------------------------------------------------------------------------------------------------------------------------------------------------------------------------------------------------------------------------------------------|--------------------------------|-------------------------------------------------------------------------------------------------------------------------------------------------------------------------------------------------------------------------------------------------------------|
| CHA2DS2 VASc score component: PAD                                              | INUK.G73..00, INUK.G73..11, INUK.G73..12, INUK.G73..13, INUK.G734.00, INUK.G73y.00, INUK.G73z.00, INUK.G73z000, INUK.G73z011, INUK.G73z012, INUK.G73zz00, INUK.Gyu7400 | 170.208, 170.209, 170.212, 170.22, 170.222, 170.223, 170.224, 170.229, 170.231, 170.234, 170.238, 170.239, 170.24, 170.242, 170.249, 170.25, 170.262, 170.268, 170.269, 170.29, 170.293, 170.298, 170.299, 170.3, 170.301, 170.302, 170.308, 170.311, 170.312, 170.313, 170.319, 170.321, 170.322, 170.323, 170.33, 170.332, 170.333, 170.334, 170.338, 170.339, 170.34, 170.349, 170.36, 170.362, 170.368, 170.391, 170.398, 170.399, 170.40, 170.401, 170.402, 170.413, 170.419, 170.42, 170.422, 170.428, 170.43, 170.432, 170.433, 170.434, 170.44, 170.442, 170.443, 170.445, 170.449, 170.461, 170.462, 170.463, 170.464, 170.491, 170.498, 170.499, 170.5, 170.50, 170.501, 170.509, 170.51, 170.518, 170.519, 170.52, 170.521, 170.523, 170.53, 170.531, 170.532, 170.533, 170.535, 170.538, 170.539, 170.54, 170.55, 170.56, 170.561, 170.562, 170.568, 170.59, 170.591, 170.593, 170.6, 170.601, 170.608, 170.609, 170.61, 170.611, 170.613, 170.62, 170.623, 170.628, 170.629, 170.633, 170.634, 170.641, 170.642, 170.643, 170.645, 170.649, 170.66, 170.662, 170.692, 170.693, 170.699, 170.7, 170.701, 170.702, 170.703, 170.711, 170.713, 170.718, 170.72, 170.721, 170.733, 170.734, 170.735, 170.741, 170.743, 170.745, 170.749, 170.761, 170.762, 170.763, 170.768, 170.769, 170.792, 170.793, 173.9, 170.2, 170.201, 170.202, 170.203, 170.21, 170.211, 170.213, 170.214, 170.219, 170.221, 170.23, 170.232, 170.233, 170.235, 170.24, 170.244, 170.245, 170.248, 170.26, 170.261, 170.263, 170.29, 170.291, 170.30, 170.303, 170.309, 170.31, 170.318, 170.32, 170.323, 170.329, 170.331, 170.335, 170.341, 170.342, 170.343, 170.344, 170.345, 170.348, 170.35, 170.361, 170.363, 170.364, 170.39, 170.392, 170.393, 170.4, 170.403, 170.408, 170.409, 170.41, 170.411, 170.412, 170.418, 170.421, 170.423, 170.424, 170.431, 170.435, 170.438, 170.439, 170.441, 170.444, 170.445, 170.45, 170.46, 170.468, 170.49, 170.492, 170.493, 170.502, 170.503, 170.508, 170.511, 170.512, 170.513, 170.522, 170.523, 170.529, 170.534, 170.54, 170.541, 170.542, 170.543, 170.544, 170.548, 170.549, 170.563, 170.569, 170.592, 170.598, 170.599, 170.60, 170.602, 170.603, 170.612, 170.618, 170.619, 170.62, 170.622, 170.63, 170.631, 170.632, 170.634, 170.635, 170.636, 170.64, 170.644, 170.648, 170.65, 170.661, 170.663, 170.668 | Quality Outcomes Framework V38 | Colantonio LD, Shannon ED, Orroth KK, Zaha R, Jackson EA, Rosenson RS, Exter J, Mues KE, Muntner P. Ischemic Event Rates in Very-High-Risk Adults. J Am Coll Cardiol. 2019 Nov 19;74(20):2496-2507. doi:10.1016/j.jacc.2019.09.025. PMID: 31727288.         |
| CHA2DS2 VASc score component: aortic plaque                                    | INUK.G700.00                                                                                                                                                           | 170.0                                                                                                                                                                                                                                                                                                                                                                                                                                                                                                                                                                                                                                                                                                                                                                                                                                                                                                                                                                                                                                                                                                                                                                                                                                                                                                                                                                                                                                                                                                                                                                                                                                                                                                                                                                                                                                                                                                                                                                                                                                                                                                                                                                                                                                                                                                                                                   |                                | Tischer Ts, Schneider R, Lauschke J, et al. Prevalence of atrial fibrillation in patients with high CHADS2- and CHA2DS2VASc-scores: anticoagulate or monitor high-risk patients?. Pacing Clin Electrophysiol. 2014;37(12):1651-1657. doi:10.1111/pace.12470 |
| CHA2DS2 VASc score component: vascular disease (MI, PAD, or aortic plaque)     | See "Myocardial infarction", "CHA2DS2 VASc score component: PAD", and "CHA2DS2 VASc score component: aortic plaque" above                                              | See "Myocardial infarction", "CHA2DS2 VASc score component: PAD", and "CHA2DS2 VASc score component: aortic plaque" above                                                                                                                                                                                                                                                                                                                                                                                                                                                                                                                                                                                                                                                                                                                                                                                                                                                                                                                                                                                                                                                                                                                                                                                                                                                                                                                                                                                                                                                                                                                                                                                                                                                                                                                                                                                                                                                                                                                                                                                                                                                                                                                                                                                                                               |                                |                                                                                                                                                                                                                                                             |
| CHA2DS2 VASc score component: diabetes mellitus                                | See "Diabetes Mellitus" above                                                                                                                                          | See "Diabetes Mellitus" above                                                                                                                                                                                                                                                                                                                                                                                                                                                                                                                                                                                                                                                                                                                                                                                                                                                                                                                                                                                                                                                                                                                                                                                                                                                                                                                                                                                                                                                                                                                                                                                                                                                                                                                                                                                                                                                                                                                                                                                                                                                                                                                                                                                                                                                                                                                           |                                |                                                                                                                                                                                                                                                             |
| CHA2DS2 VASc score component: hypertension, including use of antihypertensives | See "Hypertension" and "Antihypertensives" above                                                                                                                       | See "Hypertension" and "Antihypertensives" above                                                                                                                                                                                                                                                                                                                                                                                                                                                                                                                                                                                                                                                                                                                                                                                                                                                                                                                                                                                                                                                                                                                                                                                                                                                                                                                                                                                                                                                                                                                                                                                                                                                                                                                                                                                                                                                                                                                                                                                                                                                                                                                                                                                                                                                                                                        |                                |                                                                                                                                                                                                                                                             |
