# Supplementary material for: Using primary care data to assess comparative effectiveness and safety of apixaban and rivaroxaban in patients with nonvalvular atrial fibrillation in the UK: an observational cohort study
Source: HighWire-hosted journal article supplement (doi:10.1136/bmjopen-2022-064662), 2022-10-01
Supplement: bmjopen-2022-064662supp004_data_supplement.pdf [file bmjopen-2022-064662supp004_data_supplement.pdf]

Supplemental Table 1. Baseline characteristics of patients with nonvalvular atrial fibrillation newly initiating a DOAC, before and after propensity score matching: characteristics not included in propensity score models due to high missingness assessed in the year prior to and including index date

|                                                                                                          | Patient characteristics before propensity score matching |                      |                           |                      | Patient characteristics after propensity score matching |                      |       |                        |                          |       |                      |                           |       |
|----------------------------------------------------------------------------------------------------------|----------------------------------------------------------|----------------------|---------------------------|----------------------|---------------------------------------------------------|----------------------|-------|------------------------|--------------------------|-------|----------------------|---------------------------|-------|
|                                                                                                          | Apixaban                                                 | Rivaroxaban          | Edoxaban                  | Dabigatran           | Apixaban                                                | Rivaroxaban          | ASD   | Apixaban               | Other DOACs              | ASD   | Rivaroxaban          | Other DOACs               | ASD   |
| Number of patients                                                                                       | 2,801                                                    | 2,221                | 398                       | 261                  | 1,839                                                   | 1,839                |       | 2,276                  | 2,276                    |       | 1,985                | 1,985                     |       |
| <b>Patient characteristics, evaluated as the last value observed in the one year prior to index date</b> |                                                          |                      |                           |                      |                                                         |                      |       |                        |                          |       |                      |                           |       |
| Marital status                                                                                           |                                                          |                      |                           |                      |                                                         |                      | 0.222 |                        |                          | 0.128 |                      |                           | 0.289 |
| Married; n (%)                                                                                           | 32 (1.1%)                                                | 21 (0.9%)            | 8 (2.0%)                  | 1 (0.4%)             | 21 (1.1%)                                               | 18 (1.0%)            |       | 28 (1.2%)              | 28 (1.2%)                |       | 19 (1.0%)            | 26 (1.3%)                 |       |
| Unmarried; n (%)                                                                                         | 13 (0.5%)                                                | 11 (0.5%)            | 3 (0.8%)                  | 0 (0.0%)             | 8 (0.4%)                                                | 11 (0.6%)            |       | 9 (0.4%)               | 12 (0.5%)                |       | 11 (0.6%)            | 8 (0.4%)                  |       |
| Missing; n (%)                                                                                           | 2,756 (98.4%)                                            | 2,189 (98.6%)        | 387 (97.2%)               | 260 (99.6%)          | 1,810 (98.4%)                                           | 1,810 (98.4%)        |       | 2,239 (98.4%)          | 2,236 (98.2%)            |       | 1,955 (98.5%)        | 1,951 (98.3%)             |       |
| Cigarettes per day                                                                                       |                                                          |                      |                           |                      |                                                         |                      | 0.216 |                        |                          | 0.150 |                      |                           | 0.163 |
| mean (sd)                                                                                                | 10.50 (5.98)                                             | 12.22 (8.33)         | 12.25 (8.28)              | 11.15 (5.98)         | 10.51 (6.01)                                            | 12.00 (7.71)         |       | 10.34 (6.05)           | 11.38 (7.72)             |       | 12.17 (8.10)         | 10.99 (6.27)              |       |
| median [IQR]                                                                                             | 10.00 [5.75, 15.00]                                      | 10.00 [5.00, 16.25]  | 10.00 [6.50, 15.00]       | 10.00 [6.00, 17.50]  | 10.00 [5.50, 15.00]                                     | 10.00 [5.00, 15.00]  |       | 10.00 [5.75, 15.00]    | 10.00 [5.00, 15.00]      |       | 10.00 [5.00, 20.00]  | 10.00 [6.00, 15.00]       |       |
| Missing; n (%)                                                                                           | 2,695 (96.2%)                                            | 2,127 (95.8%)        | 382 (96.0%)               | 248 (95.0%)          | 1,774 (96.5%)                                           | 1,764 (95.9%)        |       | 2,190 (96.2%)          | 2,181 (95.8%)            |       | 1,907 (96.1%)        | 1,913 (96.4%)             |       |
| Glasses per day*                                                                                         |                                                          |                      |                           |                      |                                                         |                      | 0.076 |                        |                          | 0.043 |                      |                           | 0.128 |
| mean (sd)                                                                                                | 40,314.49 (901,176.02)                                   | 14.69 (15.77)        | 175,469.73 (3,379,675.36) | 20.22 (35.00)        | 58,421.88 (1,084,888.39)                                | 15.00 (16.19)        |       | 46,984.77 (872,895.01) | 99,476.87 (1,413,606.11) |       | 14.70 (15.95)        | 162,906.26 (1,806,540.38) |       |
| median [IQR]                                                                                             | 10.00 [2.00, 18.00]                                      | 10.00 [4.00, 20.00]  | 12.00 [5.00, 20.25]       | 10.00 [2.00, 21.50]  | 10.00 [2.00, 20.00]                                     | 10.00 [4.00, 20.00]  |       | 10.00 [2.00, 18.00]    | 10.00 [4.00, 21.00]      |       | 10.00 [4.00, 20.00]  | 10.00 [3.00, 20.00]       |       |
| Missing; n (%)                                                                                           | 2,301 (82.1%)                                            | 1,822 (82.0%)        | 328 (82.4%)               | 212 (81.2%)          | 1,494 (81.2%)                                           | 1,504 (81.8%)        |       | 1,847 (81.2%)          | 1,871 (82.2%)            |       | 1,626 (81.9%)        | 1,614 (81.3%)             |       |
| BMI (kg/m <sup>2</sup> )                                                                                 |                                                          |                      |                           |                      |                                                         |                      | 0.083 |                        |                          | 0.045 |                      |                           | 0.074 |
| mean (sd)                                                                                                | 29.20 (6.24)                                             | 29.86 (6.51)         | 28.81 (6.28)              | 29.83 (6.34)         | 29.23 (6.29)                                            | 29.75 (6.42)         |       | 29.21 (6.24)           | 29.49 (6.43)             |       | 29.78 (6.48)         | 29.30 (6.46)              |       |
| median [IQR]                                                                                             | 28.30 [24.70, 32.60]                                     | 28.90 [25.30, 33.40] | 27.80 [24.50, 32.23]      | 29.20 [25.40, 32.90] | 28.30 [24.70, 32.40]                                    | 28.80 [25.30, 33.40] |       | 28.40 [24.78, 32.60]   | 28.55 [25.08, 33.00]     |       | 28.80 [25.20, 33.40] | 28.50 [24.80, 32.60]      |       |
| Missing; n (%)                                                                                           | 970 (34.6%)                                              | 846 (38.1%)          | 104 (26.1%)               | 98 (37.5%)           | 672 (36.5%)                                             | 702 (38.2%)          |       | 790 (34.7%)            | 830 (36.5%)              |       | 765 (38.5%)          | 708 (35.7%)               |       |
| HbA1c (mmol/mol)                                                                                         |                                                          |                      |                           |                      |                                                         |                      | 0.066 |                        |                          | 0.076 |                      |                           | 0.075 |
| mean (sd)                                                                                                | 46.53 (15.17)                                            | 48.59 (16.25)        | 46.69 (14.76)             | 46.92 (13.99)        | 46.87 (16.39)                                           | 47.94 (16.05)        |       | 46.41 (15.13)          | 47.58 (16.65)            |       | 48.34 (16.04)        | 47.12 (16.24)             |       |
| median [IQR]                                                                                             | 44.00 [39.00, 52.00]                                     | 45.00 [39.00, 54.00] | 43.00 [39.00, 52.25]      | 44.00 [40.00, 52.00] | 44.00 [39.00, 53.00]                                    | 44.00 [39.00, 53.00] |       | 44.00 [39.00, 52.00]   | 44.00 [39.00, 53.00]     |       | 45.00 [39.00, 54.00] | 44.00 [39.00, 53.00]      |       |
| Missing; n (%)                                                                                           | 1,544 (55.1%)                                            | 1,235 (55.6%)        | 252 (63.3%)               | 150 (57.5%)          | 1,025 (55.7%)                                           | 1,034 (56.2%)        |       | 1,262 (55.4%)          | 1,299 (57.1%)            |       | 1,104 (55.6%)        | 1,110 (55.9%)             |       |
| INR                                                                                                      |                                                          |                      |                           |                      |                                                         |                      | 0.036 |                        |                          | 0.021 |                      |                           | 0.044 |
| mean (sd)                                                                                                | 4.77 (13.57)                                             | 3.77 (8.53)          | 8.34 (19.23)              | 2.01 (0.81)          | 4.33 (12.41)                                            | 3.94 (9.40)          |       | 4.71 (13.54)           | 4.44 (11.17)             |       | 3.94 (9.07)          | 4.42 (12.60)              |       |
| median [IQR]                                                                                             | 2.40 [1.80, 2.80]                                        | 2.30 [1.80, 2.90]    | 2.40 [2.00, 3.20]         | 2.00 [1.40, 2.38]    | 2.40 [1.80, 2.80]                                       | 2.30 [1.80, 2.90]    |       | 2.40 [1.80, 2.80]      | 2.30 [1.80, 2.90]        |       | 2.30 [1.80, 2.90]    | 2.30 [1.80, 2.75]         |       |
| Missing; n (%)                                                                                           | 2,464 (88.0%)                                            | 1,880 (84.6%)        | 349 (87.7%)               | 225 (86.2%)          | 1,606 (87.3%)                                           | 1,575 (85.6%)        |       | 1,982 (87.1%)          | 1,952 (85.8%)            |       | 1,685 (84.9%)        | 1,708 (86.0%)             |       |
| GFR (ml/min/1.73 m <sup>2</sup> )                                                                        |                                                          |                      |                           |                      |                                                         |                      | 0.135 |                        |                          | 0.131 |                      |                           | 0.145 |
| mean (sd)                                                                                                | 61.04 (16.17)                                            | 63.66 (15.95)        | 62.25 (15.62)             | 64.86 (15.23)        | 61.49 (16.24)                                           | 63.67 (16.01)        |       | 61.21 (16.17)          | 63.30 (15.79)            |       | 63.72 (15.97)        | 61.39 (16.30)             |       |
| median [IQR]                                                                                             | 61.00 [50.00, 73.00]                                     | 64.00 [52.00, 76.00] | 60.00 [52.00, 76.00]      | 65.00 [54.00, 79.00] | 61.00 [50.00, 74.00]                                    | 64.00 [52.00, 76.00] |       | 61.00 [50.00, 74.00]   | 64.00 [52.00, 76.00]     |       | 64.00 [52.00, 76.00] | 60.40 [50.00, 74.00]      |       |
| Missing; n (%)                                                                                           | 1,052 (37.6%)                                            | 870 (39.2%)          | 190 (47.7%)               | 94 (36.0%)           | 736 (40.0%)                                             | 714 (38.8%)          |       | 879 (38.6%)            | 909 (39.9%)              |       | 781 (39.3%)          | 786 (39.6%)               |       |
| CrCl (ml/min)                                                                                            |                                                          |                      |                           |                      |                                                         |                      | 0.029 |                        |                          | 0.017 |                      |                           | 0.066 |
| mean (sd)                                                                                                | 63.93 (22.40)                                            | 65.75 (19.46)        | 56.73 (21.52)             | 71.84 (4.95)         | 66.81 (21.09)                                           | 66.22 (19.78)        |       | 63.89 (21.95)          | 64.24 (20.10)            |       | 65.75 (19.46)        | 67.14 (22.51)             |       |
| median [IQR]                                                                                             | 63.00 [48.00, 81.50]                                     | 65.00 [52.50, 77.25] | 50.00 [40.00, 65.00]      | 71.00 [68.25, 75.84] | 64.50 [49.43, 82.25]                                    | 66.35 [51.50, 77.75] |       | 62.50 [48.75, 81.25]   | 63.50 [47.50, 77.25]     |       | 65.00 [52.50, 77.25] | 66.50 [46.50, 85.11]      |       |
| Missing; n (%)                                                                                           | 2,700 (96.4%)                                            | 2,175 (97.9%)        | 383 (96.2%)               | 256 (98.1%)          | 1,793 (97.5%)                                           | 1,795 (97.6%)        |       | 2,194 (96.4%)          | 2,214 (97.3%)            |       | 1,939 (97.7%)        | 1,943 (97.9%)             |       |
| <b>Apixaban and rivaroxaban dosage, evaluated on the index date; n (%)**</b>                             |                                                          |                      |                           |                      |                                                         |                      |       |                        |                          |       |                      |                           |       |
| Apixaban 2.5mg                                                                                           | 761 (27.2%)                                              | -                    | -                         | -                    | 512 (27.8%)                                             | -                    | -     | 622 (27.3%)            | -                        | -     | -                    | 499 (25.1%)               | -     |
| Apixaban 5mg                                                                                             | 2,063 (73.7%)                                            | -                    | -                         | -                    | 1,342 (73.0%)                                           | -                    | -     | 1,674 (73.6%)          | -                        | -     | -                    | 1,161 (58.5%)             | -     |
| Rivaroxaban 2.5mg                                                                                        | -                                                        | 14 (0.6%)            | -                         | -                    | -                                                       | 9 (0.5%)             | -     | -                      | 9 (0.4%)                 | -     | 12 (0.6%)            | -                         | -     |
| Rivaroxaban 10mg                                                                                         | -                                                        | 18 (0.8%)            | -                         | -                    | -                                                       | 15 (0.8%)            | -     | -                      | 11 (0.5%)                | -     | 14 (0.7%)            | -                         | -     |
| Rivaroxaban 15mg                                                                                         | -                                                        | 409 (18.4%)          | -                         | -                    | -                                                       | 341 (18.5%)          | -     | -                      | 329 (14.5%)              | -     | 370 (18.6%)          | -                         | -     |
| Rivaroxaban 20mg                                                                                         | -                                                        | 1,793 (80.7%)        | -                         | -                    | -                                                       | 1,484 (80.7%)        | -     | -                      | 1,368 (60.1%)            | -     | 1,600 (80.6%)        | -                         | -     |
| Edoxaban 15mg                                                                                            | -                                                        | -                    | 2 (0.5%)                  | -                    | -                                                       | -                    | -     | -                      | -                        | -     | -                    | 1 (0.1%)                  | -     |
| Edoxaban 30mg                                                                                            | -                                                        | -                    | 108 (27.1%)               | -                    | -                                                       | -                    | -     | -                      | -                        | -     | -                    | 34 (1.7%)                 | -     |
| Edoxaban 60mg                                                                                            | -                                                        | -                    | 295 (74.1%)               | -                    | -                                                       | -                    | -     | -                      | -                        | -     | -                    | 91 (4.6%)                 | -     |
| Dabigatran 75mg                                                                                          | -                                                        | -                    | -                         | 16 (6.1%)            | -                                                       | -                    | -     | -                      | -                        | -     | -                    | 14 (0.6%)                 | -     |
| Dabigatran 110mg                                                                                         | -                                                        | -                    | -                         | 123 (47.1%)          | -                                                       | -                    | -     | -                      | -                        | -     | -                    | 91 (4.0%)                 | -     |
| Dabigatran 150mg                                                                                         | -                                                        | -                    | -                         | 125 (47.9%)          | -                                                       | -                    | -     | -                      | -                        | -     | -                    | 88 (3.9%)                 | -     |

Characteristics assessed in the year prior to and including index date.

SD = standard deviation; IQR = interquartile range; DOAC = direct oral anticoagulants; ASD = absolute standardized difference.

\* Values reported reflect all available data without modification or cleaning.

\*\* Patients with prescriptions for multiple dosages are reported as having all dosages observed

**Supplemental table 2. Per-protocol analysis using a 3000 baseline period for all characteristics: Baseline characteristics of patients with nonvalvular atrial fibrillation newly initiating a DOAC, before and after propensity score matching**

|                                        | Patient characteristics before propensity score matching |               |              |              | Patient characteristics after propensity score matching |               |       |               |               |       |               |               |       |
|----------------------------------------|----------------------------------------------------------|---------------|--------------|--------------|---------------------------------------------------------|---------------|-------|---------------|---------------|-------|---------------|---------------|-------|
|                                        | Apixaban                                                 | Rivaroxaban   | Edoxaban     | Dabigatran   | Apixaban                                                | Rivaroxaban   | ASD   | Apixaban      | Other DOACs   | ASD   | Rivaroxaban   | Other DOACs   | ASD   |
| Number of patients                     | 2,801                                                    | 2,221         | 398          | 261          | 1,840                                                   | 1,840         |       | 2,301         | 2,301         |       | 2,023         | 2,023         |       |
| Year of Cohort Entry Date              |                                                          |               |              |              |                                                         |               | 0.034 |               |               | 0.017 |               |               | 0.038 |
| 2014                                   | 76 (2.7%)                                                | 138 (6.2%)    | 0 (0.0%)     | 32 (12.3%)   | 76 (4.1%)                                               | 81 (4.4%)     |       | 76 (3.3%)     | 78 (3.4%)     |       | 116 (5.7%)    | 108 (5.3%)    |       |
| 2015                                   | 365 (13.0%)                                              | 548 (24.7%)   | 0 (0.0%)     | 81 (31.0%)   | 357 (19.4%)                                             | 359 (19.5%)   |       | 362 (15.7%)   | 372 (16.2%)   |       | 441 (21.8%)   | 436 (21.6%)   |       |
| 2016                                   | 571 (20.4%)                                              | 646 (29.1%)   | 11 (2.8%)    | 77 (29.5%)   | 532 (28.9%)                                             | 523 (28.4%)   |       | 555 (24.1%)   | 550 (23.9%)   |       | 582 (28.8%)   | 596 (29.5%)   |       |
| 2017                                   | 546 (19.5%)                                              | 383 (17.2%)   | 20 (5.0%)    | 42 (16.1%)   | 388 (21.1%)                                             | 374 (20.3%)   |       | 427 (18.6%)   | 423 (18.4%)   |       | 379 (18.7%)   | 392 (19.4%)   |       |
| 2018                                   | 530 (18.9%)                                              | 257 (11.6%)   | 115 (28.9%)  | 21 (8.0%)    | 242 (13.2%)                                             | 256 (13.9%)   |       | 393 (17.1%)   | 385 (16.7%)   |       | 257 (12.7%)   | 250 (12.4%)   |       |
| 2019                                   | 423 (15.1%)                                              | 143 (6.4%)    | 129 (32.4%)  | 5 (1.9%)     | 145 (7.9%)                                              | 142 (7.7%)    |       | 263 (11.4%)   | 268 (11.6%)   |       | 142 (7.0%)    | 146 (7.2%)    |       |
| 2020                                   | 290 (10.4%)                                              | 106 (4.8%)    | 123 (30.9%)  | 3 (1.1%)     | 100 (5.4%)                                              | 105 (5.7%)    |       | 225 (9.8%)    | 225 (9.8%)    |       | 106 (5.2%)    | 95 (4.7%)     |       |
| Age (years)                            |                                                          |               |              |              |                                                         |               | 0.053 |               |               | 0.038 |               |               | 0.038 |
| mean (sd)                              | 77.35 (8.54)                                             | 76.71 (8.62)  | 77.11 (8.35) | 76.23 (8.56) | 77.34 (8.60)                                            | 76.89 (8.26)  |       | 77.14 (8.63)  | 76.82 (8.39)  |       | 76.84 (8.53)  | 77.17 (8.72)  |       |
| median [IQR]                           | 78 [72, 83]                                              | 77 [71, 83]   | 78 [72, 83]  | 77 [70, 82]  | 78 [71, 83]                                             | 77 [71, 83]   |       | 77 [71, 83]   | 77 [71, 83]   |       | 77 [71, 83]   | 78 [71, 83]   |       |
| Age categories (years)                 |                                                          |               |              |              |                                                         |               | 0.021 |               |               | 0.003 |               |               | 0.019 |
| < 55                                   | 30 (1.1%)                                                | 34 (1.5%)     | 5 (1.3%)     | 4 (1.5%)     | 18 (1.0%)                                               | 17 (0.9%)     |       | 26 (1.1%)     | 26 (1.1%)     |       | 30 (1.5%)     | 26 (1.3%)     |       |
| 55 - 64                                | 131 (4.7%)                                               | 120 (5.4%)    | 18 (4.5%)    | 13 (5.0%)    | 96 (5.2%)                                               | 92 (5.0%)     |       | 116 (5.0%)    | 117 (5.1%)    |       | 99 (4.9%)     | 100 (4.9%)    |       |
| 65 - 74                                | 808 (28.8%)                                              | 634 (28.5%)   | 120 (30.2%)  | 83 (31.8%)   | 514 (27.9%)                                             | 530 (28.8%)   |       | 686 (29.8%)   | 683 (29.7%)   |       | 577 (28.5%)   | 585 (28.9%)   |       |
| >= 75                                  | 1,832 (65.4%)                                            | 1,433 (64.5%) | 255 (64.1%)  | 161 (61.7%)  | 1,212 (65.9%)                                           | 1,201 (65.3%) |       | 1,473 (64.0%) | 1,475 (64.1%) |       | 1,317 (65.1%) | 1,312 (64.9%) |       |
| Gender                                 |                                                          |               |              |              |                                                         |               | 0.003 |               |               | 0.006 |               |               | 0.013 |
| Female                                 | 1,070 (38.2%)                                            | 785 (35.3%)   | 158 (39.7%)  | 81 (31.0%)   | 661 (35.9%)                                             | 664 (36.1%)   |       | 864 (37.5%)   | 857 (37.2%)   |       | 730 (36.1%)   | 717 (35.4%)   |       |
| Male                                   | 1,731 (61.8%)                                            | 1,436 (64.7%) | 240 (60.3%)  | 180 (69.0%)  | 1,179 (64.1%)                                           | 1,176 (63.9%) |       | 1,437 (62.5%) | 1,444 (62.8%) |       | 1,293 (63.9%) | 1,306 (64.6%) |       |
| Non-Major Bleeding Events              |                                                          |               |              |              |                                                         |               | 0.010 |               |               | 0.017 |               |               | 0.026 |
| Anemia                                 | 79 (2.8%)                                                | 63 (2.8%)     | 5 (1.3%)     | 9 (3.4%)     | 52 (2.8%)                                               | 50 (2.7%)     |       | 55 (2.4%)     | 58 (2.5%)     |       | 53 (2.6%)     | 51 (2.5%)     | 0.006 |
| Diabetes Mellitus                      | 104 (3.7%)                                               | 98 (4.4%)     | 7 (1.8%)     | 11 (4.2%)    | 76 (4.1%)                                               | 69 (3.8%)     | 0.020 | 85 (3.7%)     | 89 (3.9%)     | 0.009 | 83 (4.1%)     | 86 (4.3%)     | 0.007 |
| Hypertension                           | 165 (5.9%)                                               | 132 (5.9%)    | 22 (5.5%)    | 18 (6.9%)    | 106 (5.8%)                                              | 99 (5.4%)     | 0.017 | 138 (6.0%)    | 131 (5.7%)    | 0.013 | 117 (5.8%)    | 126 (6.2%)    | 0.019 |
| Heart Failure                          | 208 (7.4%)                                               | 161 (7.2%)    | 19 (4.8%)    | 13 (5.0%)    | 126 (6.8%)                                              | 119 (6.5%)    | 0.015 | 149 (6.5%)    | 155 (6.7%)    | 0.010 | 139 (6.9%)    | 135 (6.7%)    | 0.008 |
| Osteoporosis and Hip Fractures         | 32 (1.1%)                                                | 23 (1.0%)     | 9 (2.3%)     | 5 (1.9%)     | 16 (0.9%)                                               | 20 (1.1%)     | 0.022 | 30 (1.3%)     | 28 (1.2%)     | 0.008 | 23 (1.1%)     | 18 (0.9%)     | 0.025 |
| Malignant Neoplasms                    | 111 (4.0%)                                               | 77 (3.5%)     | 17 (4.3%)    | 12 (4.6%)    | 73 (4.0%)                                               | 63 (3.4%)     | 0.029 | 85 (3.7%)     | 86 (3.7%)     | 0.002 | 74 (3.7%)     | 72 (3.6%)     | 0.005 |
| Acute Kidney Injury                    | 49 (1.7%)                                                | 30 (1.4%)     | 3 (0.8%)     | 2 (0.8%)     | 24 (1.3%)                                               | 25 (1.4%)     | 0.005 | 31 (1.3%)     | 33 (1.4%)     | 0.007 | 28 (1.4%)     | 33 (1.6%)     | 0.020 |
| Chronic Kidney Disease                 | 80 (2.9%)                                                | 80 (3.6%)     | 9 (2.3%)     | 6 (2.3%)     | 59 (3.2%)                                               | 59 (3.2%)     | 0.000 | 73 (3.2%)     | 70 (3.0%)     | 0.008 | 69 (3.4%)     | 64 (3.2%)     | 0.014 |
| Asthma and COPD                        | 145 (5.2%)                                               | 135 (6.1%)    | 17 (4.3%)    | 10 (3.8%)    | 108 (5.9%)                                              | 109 (5.9%)    | 0.002 | 125 (5.4%)    | 123 (5.3%)    | 0.004 | 110 (5.4%)    | 116 (5.7%)    | 0.013 |
| Dementia                               | 34 (1.2%)                                                | 23 (1.0%)     | 1 (0.3%)     | 2 (0.8%)     | 19 (1.0%)                                               | 20 (1.1%)     | 0.005 | 23 (1.0%)     | 25 (1.1%)     | 0.009 | 22 (1.1%)     | 21 (1.0%)     | 0.005 |
| Aspirin                                | 824 (29.4%)                                              | 709 (31.9%)   | 89 (22.4%)   | 93 (35.6%)   | 569 (30.9%)                                             | 569 (30.9%)   | 0.000 | 653 (28.4%)   | 684 (29.7%)   | 0.030 | 643 (31.8%)   | 628 (31.0%)   | 0.016 |
| Antiplatelets (other than aspirin)     | 164 (5.9%)                                               | 123 (5.5%)    | 18 (4.5%)    | 16 (6.1%)    | 99 (5.4%)                                               | 110 (6.0%)    | 0.026 | 130 (5.6%)    | 127 (5.5%)    | 0.006 | 115 (5.7%)    | 114 (5.6%)    | 0.002 |
| Warfarin                               | 391 (14.0%)                                              | 397 (17.9%)   | 53 (13.3%)   | 41 (15.7%)   | 292 (15.9%)                                             | 294 (16.0%)   | 0.003 | 350 (15.2%)   | 344 (15.0%)   | 0.007 | 328 (16.2%)   | 322 (15.9%)   | 0.008 |
| Antianemic Preparations                | 519 (18.5%)                                              | 334 (15.0%)   | 49 (12.3%)   | 33 (12.6%)   | 276 (15.0%)                                             | 294 (16.0%)   | 0.027 | 369 (16.0%)   | 365 (15.9%)   | 0.005 | 307 (15.2%)   | 298 (14.7%)   | 0.012 |
| NSAIDs                                 | 340 (12.1%)                                              | 275 (12.4%)   | 50 (12.6%)   | 42 (16.1%)   | 237 (12.9%)                                             | 236 (12.8%)   | 0.002 | 288 (12.5%)   | 286 (12.4%)   | 0.003 | 261 (12.9%)   | 250 (12.4%)   | 0.016 |
| Opioids                                | 862 (30.8%)                                              | 640 (28.8%)   | 113 (28.4%)  | 73 (28.0%)   | 532 (28.9%)                                             | 534 (29.0%)   | 0.002 | 666 (28.9%)   | 670 (29.1%)   | 0.004 | 596 (29.5%)   | 585 (28.9%)   | 0.012 |
| SSRIs                                  | 240 (8.6%)                                               | 181 (8.1%)    | 36 (9.0%)    | 17 (6.5%)    | 147 (8.0%)                                              | 157 (8.5%)    | 0.020 | 194 (8.4%)    | 195 (8.5%)    | 0.002 | 164 (8.1%)    | 161 (8.0%)    | 0.005 |
| Antidepressants (other than SSRIs)     | 301 (10.7%)                                              | 235 (10.6%)   | 36 (9.0%)    | 26 (10.0%)   | 193 (10.5%)                                             | 199 (10.8%)   | 0.011 | 238 (10.3%)   | 236 (10.3%)   | 0.003 | 214 (10.6%)   | 207 (10.2%)   | 0.011 |
| Antiepileptics                         | 210 (7.5%)                                               | 150 (6.8%)    | 25 (6.3%)    | 19 (7.3%)    | 124 (6.7%)                                              | 127 (6.9%)    | 0.006 | 154 (6.7%)    | 163 (7.1%)    | 0.015 | 142 (7.0%)    | 138 (6.8%)    | 0.008 |
| Antipsychotics                         | 141 (5.0%)                                               | 92 (4.1%)     | 20 (5.0%)    | 12 (4.6%)    | 80 (4.3%)                                               | 82 (4.5%)     | 0.005 | 109 (4.7%)    | 103 (4.5%)    | 0.012 | 91 (4.5%)     | 87 (4.3%)     | 0.010 |
| Benzodiazepines                        | 256 (9.1%)                                               | 182 (8.2%)    | 43 (10.8%)   | 23 (8.8%)    | 162 (8.8%)                                              | 154 (8.4%)    | 0.016 | 196 (8.5%)    | 201 (8.7%)    | 0.008 | 170 (8.4%)    | 173 (8.6%)    | 0.005 |
| Lipid Lowering Drugs                   | 1,539 (54.9%)                                            | 1,199 (54.0%) | 191 (48.0%)  | 138 (52.9%)  | 1,012 (55.0%)                                           | 998 (54.2%)   | 0.015 | 1,216 (52.8%) | 1,254 (54.5%) | 0.033 | 1,089 (53.8%) | 1,092 (54.0%) | 0.003 |
| Insulin                                | 91 (3.2%)                                                | 80 (3.6%)     | 9 (2.3%)     | 5 (1.9%)     | 57 (3.1%)                                               | 61 (3.3%)     | 0.012 | 70 (3.0%)     | 73 (3.2%)     | 0.008 | 61 (3.0%)     | 67 (3.3%)     | 0.017 |
| Antihyperglycemics other than Insulins | 525 (18.7%)                                              | 466 (21.0%)   | 51 (12.8%)   | 54 (20.7%)   | 363 (19.7%)                                             | 372 (20.2%)   | 0.012 | 421 (18.3%)   | 446 (19.4%)   | 0.028 | 406 (20.1%)   | 396 (19.6%)   | 0.012 |
| Antihypertensives                      | 2,611 (93.2%)                                            | 2,079 (93.6%) | 366 (92.0%)  | 242 (92.7%)  | 1,723 (93.6%)                                           | 1,718 (93.4%) | 0.011 | 2,141 (93.0%) | 2,151 (93.5%) | 0.017 | 1,889 (93.4%) | 1,901 (94.0%) | 0.024 |
| Antiarrhythmics                        | 94 (3.4%)                                                | 91 (4.1%)     | 10 (2.5%)    | 10 (3.8%)    | 67 (3.6%)                                               | 70 (3.8%)     | 0.009 | 79 (3.4%)     | 80 (3.5%)     | 0.002 | 81 (4.0%)     | 75 (3.7%)     | 0.015 |
| Nitrates Cardiac Vasodilators          | 130 (4.6%)                                               | 99 (4.5%)     | 21 (5.3%)    | 9 (3.4%)     | 79 (4.3%)                                               | 81 (4.4%)     | 0.005 | 105 (4.6%)    | 105 (4.6%)    | 0.000 | 95 (4.7%)     | 100 (4.9%)    | 0.012 |
| Cardiac Stimulants                     | 347 (12.4%)                                              | 272 (12.2%)   | 30 (7.5%)    | 17 (6.5%)    | 236 (12.8%)                                             | 229 (12.4%)   | 0.011 | 271 (11.8%)   | 263 (11.4%)   | 0.011 | 237 (11.7%)   | 235 (11.6%)   | 0.003 |
| Gastrointestinal Protective Agents     | 1,214 (43.3%)                                            | 893 (40.2%)   | 173 (43.5%)  | 106 (40.6%)  | 752 (40.9%)                                             | 761 (41.4%)   | 0.010 | 952 (41.4%)   | 955 (41.5%)   | 0.003 | 830 (41.0%)   | 802 (39.6%)   | 0.028 |

|                                                           |               |               |             |             |             |             |       |               |               |       |             |             |       |
|-----------------------------------------------------------|---------------|---------------|-------------|-------------|-------------|-------------|-------|---------------|---------------|-------|-------------|-------------|-------|
| Bisphosphonates and Other Agents Affecting Bone Structure | 228 (8.1%)    | 171 (7.7%)    | 32 (8.0%)   | 15 (5.7%)   | 135 (7.3%)  | 138 (7.5%)  | 0.006 | 192 (8.3%)    | 188 (8.2%)    | 0.006 | 166 (8.2%)  | 151 (7.5%)  | 0.028 |
| Systemic Corticosteroids                                  | 442 (15.8%)   | 345 (15.5%)   | 53 (13.3%)  | 37 (14.2%)  | 272 (14.8%) | 271 (14.7%) | 0.002 | 353 (15.3%)   | 358 (15.6%)   | 0.006 | 308 (15.2%) | 307 (15.2%) | 0.001 |
| Antineoplastics                                           | 140 (5.0%)    | 99 (4.5%)     | 21 (5.3%)   | 13 (5.0%)   | 81 (4.4%)   | 88 (4.8%)   | 0.018 | 111 (4.8%)    | 113 (4.9%)    | 0.004 | 93 (4.6%)   | 90 (4.4%)   | 0.007 |
| Systemic Antibiotics                                      | 1,357 (48.4%) | 1,075 (48.4%) | 177 (44.5%) | 119 (45.6%) | 872 (47.4%) | 867 (47.1%) | 0.005 | 1,084 (47.1%) | 1,097 (47.7%) | 0.011 | 969 (47.9%) | 961 (47.5%) | 0.008 |
| Systemic Antivirals                                       | 31 (1.1%)     | 32 (1.4%)     | 3 (0.8%)    | 3 (1.1%)    | 22 (1.2%)   | 22 (1.2%)   | 0.000 | 29 (1.3%)     | 26 (1.1%)     | 0.012 | 26 (1.3%)   | 26 (1.3%)   | 0.000 |
| Vaccines and Immunoglobulins                              | 137 (4.9%)    | 204 (9.2%)    | 11 (2.8%)   | 24 (9.2%)   | 119 (6.5%)  | 131 (7.1%)  | 0.026 | 133 (5.8%)    | 134 (5.8%)    | 0.002 | 157 (7.8%)  | 138 (6.8%)  | 0.036 |
| CHA2DS2 VASc score                                        |               |               |             |             |             |             |       |               |               | 0.013 |             |             | 0.045 |
| 0                                                         | 93 (3.3%)     | 79 (3.6%)     | 16 (4.0%)   | 13 (5.0%)   | 64 (3.5%)   | 64 (3.5%)   | 0.047 | 83 (3.6%)     | 80 (3.5%)     |       | 74 (3.7%)   | 73 (3.6%)   |       |
| 1                                                         | 518 (18.5%)   | 442 (19.9%)   | 79 (19.8%)  | 57 (21.8%)  | 347 (18.9%) | 354 (19.2%) |       | 452 (19.6%)   | 459 (19.9%)   |       | 392 (19.4%) | 379 (18.7%) |       |
| 2                                                         | 1,174 (41.9%) | 949 (42.7%)   | 165 (41.5%) | 112 (42.9%) | 794 (43.2%) | 802 (43.6%) |       | 962 (41.8%)   | 964 (41.9%)   |       | 861 (42.6%) | 892 (44.1%) |       |
| 3                                                         | 868 (31.0%)   | 631 (28.4%)   | 119 (29.9%) | 63 (24.1%)  | 542 (29.5%) | 529 (28.7%) |       | 684 (29.7%)   | 682 (29.6%)   |       | 587 (29.0%) | 572 (28.3%) |       |
| 4                                                         | 133 (4.7%)    | 99 (4.5%)     | 18 (4.5%)   | 14 (5.4%)   | 79 (4.3%)   | 82 (4.5%)   |       | 108 (4.7%)    | 104 (4.5%)    |       | 95 (4.7%)   | 93 (4.6%)   |       |
| 5                                                         | 14 (0.5%)     | 20 (0.9%)     | 1 (0.3%)    | 2 (0.8%)    | 13 (0.7%)   | 9 (0.5%)    |       | 12 (0.5%)     | 12 (0.5%)     |       | 13 (0.6%)   | 14 (0.7%)   |       |
| 6                                                         | 1 (0.0%)      | 1 (0.0%)      | 0 (0.0%)    | 0 (0.0%)    | 1 (0.1%)    | 0 (0.0%)    |       | 0 (0.0%)      | 0 (0.0%)      |       | 1 (0.0%)    | 0 (0.0%)    |       |
| 7                                                         | 0 (0.0%)      | 0 (0.0%)      | 0 (0.0%)    | 0 (0.0%)    | 0 (0.0%)    | 0 (0.0%)    |       | 0 (0.0%)      | 0 (0.0%)      |       | 0 (0.0%)    | 0 (0.0%)    |       |
| 8                                                         | 0 (0.0%)      | 0 (0.0%)      | 0 (0.0%)    | 0 (0.0%)    | 0 (0.0%)    | 0 (0.0%)    |       | 0 (0.0%)      | 0 (0.0%)      |       | 0 (0.0%)    | 0 (0.0%)    |       |
| 9                                                         | 0 (0.0%)      | 0 (0.0%)      | 0 (0.0%)    | 0 (0.0%)    | 0 (0.0%)    | 0 (0.0%)    |       | 0 (0.0%)      | 0 (0.0%)      |       | 0 (0.0%)    | 0 (0.0%)    |       |

Characteristics reported as N (%) unless otherwise specified.

SD = standard deviation; IQR = interquartile range; DOAC = direct oral anticoagulants; ASD = absolute standardized difference.

**Supplemental Table 3. Per-protocol analysis using a 365d baseline period for all characteristics: Hazard ratio of stroke and secondary outcomes among patients with nonvalvular atrial fibrillation newly initiating DOACs after propensity score matching**

|                                                                               | Patients    | Events | Rate per 1,000 PY | Patients                     | Events | Rate per 1,000 PY | Hazard Ratio          |
|-------------------------------------------------------------------------------|-------------|--------|-------------------|------------------------------|--------|-------------------|-----------------------|
| <b>Apixaban vs rivaroxaban: primary and secondary outcomes</b>                |             |        |                   |                              |        |                   |                       |
| Outcome                                                                       | Apixaban    |        |                   | Rivaroxaban                  |        |                   | aHR (95% CI)          |
| Stroke, ITT                                                                   | 1,840       | 53     | 11.77             | 1,840                        | 56     | 13.00             | 0.89 (0.61, 1.30)     |
| Stroke, AT                                                                    | 1,840       | 30     | 9.26              | 1,840                        | 32     | 11.00             | 0.87 (0.53, 1.43)     |
| All-cause mortality, ITT*                                                     | 1,846       | 276    | 59.46             | 1,846                        | 264    | 61.37             | 0.96 (0.81, 1.14)     |
| Myocardial infarction (MI), ITT                                               | 1,840       | 22     | 4.84              | 1,840                        | 25     | 6.00              | 0.84 (0.47, 1.48)     |
| Transient ischemic attack                                                     | 1,840       | 32     | 7.08              | 1,840                        | 29     | 7.00              | 1.06 (0.64, 1.76)     |
| Major bleeding event, ITT                                                     | 1,840       | 117    | 26.70             | 1,840                        | 189    | 48.00             | 0.57 (0.46, 0.72)     |
| Composite angina/MI/stroke                                                    | 1,840       | 92     | 20.82             | 1,840                        | 98     | 24.00             | 0.89 (0.67, 1.18)     |
| <b>Apixaban vs rivaroxaban: primary outcome (stroke) among subgroups, ITT</b> |             |        |                   |                              |        |                   |                       |
| Subgroup                                                                      | Apixaban    |        |                   | Rivaroxaban                  |        |                   | aHR (95% CI)          |
| Age <75 years                                                                 | 631         | 12     | 7.17              | 631                          | 12     | 8.00              | 0.93 (0.42, 2.06)     |
| Age ≥75 years                                                                 | 1,195       | 37     | 13.29             | 1,195                        | 39     | 15.00             | 0.89 (0.57, 1.40)     |
| Concomitant aspirin use                                                       | 400         | 12     | 11.54             | 400                          | 9      | 9.00              | 1.24 (0.52, 2.94)     |
| No concomitant aspirin use                                                    | 1,416       | 41     | 12.09             | 1,416                        | 36     | 11.00             | 1.08 (0.69, 1.69)     |
| Prior warfarin use                                                            | 271         | 8      | 12.79             | 271                          | 10     | 17.00             | 0.73 (0.29, 1.86)     |
| No prior warfarin use                                                         | 1,528       | 43     | 11.48             | 1,528                        | 37     | 11.00             | 1.09 (0.70, 1.69)     |
| With diabetes                                                                 | 44          | 0      | 0.00              | 44                           | 2      | 20.00             | <0.001 (<0.001, >999) |
| Without diabetes                                                              | 1,771       | 55     | 12.70             | 1,771                        | 50     | 12.00             | 1.02 (0.70, 1.50)     |
| With heart failure                                                            | 83          | 1      | 5.72              | 83                           | 2      | 11.00             | 0.49 (0.04, 5.38)     |
| Without heart failure                                                         | 1,740       | 47     | 10.81             | 1,740                        | 50     | 13.00             | 0.87 (0.58, 1.30)     |
| CHA2DS2 VASc 0-1                                                              | 403         | 12     | 11.05             | 403                          | 7      | 7.00              | 1.54 (0.61, 3.93)     |
| CHA2DS2 VASc 2-3                                                              | 1,334       | 38     | 11.74             | 1,334                        | 36     | 12.00             | 0.99 (0.62, 1.56)     |
| CHA2DS2 VASc 4+                                                               | 61          | 2      | 15.19             | 61                           | 0      | 0.00              | >999 (<0.001, >999)   |
| <b>Analysis of secondary comparisons: primary outcome (stroke), ITT</b>       |             |        |                   |                              |        |                   |                       |
| Outcome                                                                       | Apixaban    |        |                   | DOACs other than apixaban    |        |                   | aHR (95% CI)          |
| Stroke                                                                        | 2,301       | 64     | 12.41             | 2,301                        | 65     | 13.00             | 0.95 (0.67, 1.34)     |
| Outcome                                                                       | Rivaroxaban |        |                   | DOACs other than rivaroxaban |        |                   | aHR (95% CI)          |
| Stroke                                                                        | 2,023       | 54     | 11.47             | 2,023                        | 58     | 12.00             | 0.99 (0.68, 1.43)     |

PY = person-years; aHR = adjusted hazard ratio; CI = confidence interval; PS = propensity score; ITT = intent-to-treat; AT = as-treated

PS model accounts for age, gender, CHA2DS2 VASc score, year of treatment initiation, and the following diagnoses and treatments in baseline: non-major bleeding events, anemia, diabetes, hypertension, heart failure, osteoporosis/hip fracture, malignant neoplasm, acute kidney injury, chronic kidney disease, asthma/copd, dementia, aspirin, antiplatelets other than aspirin, warfarin, antiemeric preparations, NSAIDs, opioids, SSRIs, antidepressants other than SSRIs, antiepileptics, antipsychotics, benzodiazepines, lipid

In analysis of stroke, MI, TIA, major bleeding events, and AMS, patients were followed until occurrence of outcome, death, end of patient registration, or end of study period (12/2020).

\* In analysis of all cause mortality, patients were followed until occurrence of outcome (death), end of study period (12/2020), or the later date of end of patient registration and any recorded death within 90 days of end of patient registration. Propensity score matched sample size for analysis of all cause mortality differs from sample size in analysis of other outcomes because of differences in censoring criteria which impact a small number of patients' eligibility for inclusion in analysis at the start of follow-up. DOACs comprised apixaban, rivaroxaban, edoxaban, dabigatran

**Supplemental Table 4: Length of follow-up and censoring reasons for the primary comparison (stroke, ITT and AT analyses) and secondary comparisons (stroke, ITT analyses) after PS-matching**

| Exposure group                               | Apixaban vs rivaroxaban (ITT) |                  | Apixaban vs rivaroxaban (AT) |                 | Apixaban vs other DOACs (ITT) |                  | Rivaroxaban vs other DOACs (ITT) |                  |
|----------------------------------------------|-------------------------------|------------------|------------------------------|-----------------|-------------------------------|------------------|----------------------------------|------------------|
|                                              | Apixaban                      | Rivaroxaban      | Apixaban                     | Rivaroxaban     | Apixaban                      | Other DOACs      | Rivaroxaban                      | Other DOACs      |
| Numer of patients                            | 1,839                         | 1,839            | 1,839                        | 1,839           | 2,276                         | 2,276            | 1,985                            | 1,985            |
| <b>Follow-up time, days</b>                  |                               |                  |                              |                 |                               |                  |                                  |                  |
| mean (sd)                                    | 891.39 (604.23)               | 839.10 (580.42)  | 647.66 (535.75)              | 574.74 (510.77) | 829.15 (586.35)               | 770.05 (553.42)  | 844.22 (588.55)                  | 894.75 (611.26)  |
| median [IQR]                                 | 845 [340, 1,368]              | 779 [322, 1,284] | 506 [197, 1,001]             | 412 [170, 855]  | 742 [298, 1,259]              | 681 [296, 1,170] | 784 [318, 1,296]                 | 828 [343, 1,399] |
| <b>Censor reason</b>                         |                               |                  |                              |                 |                               |                  |                                  |                  |
| Death                                        | 40 (2.2%)                     | 26 (1.4%)        | 24 (1.3%)                    | 18 (1.0%)       | 44 (1.9%)                     | 28 (1.2%)        | 29 (1.5%)                        | 42 (2.1%)        |
| End of patient registration                  | 943 (51%)                     | 1,074 (58%)      | 630 (34%)                    | 662 (36%)       | 1,081 (47%)                   | 1,227 (54%)      | 1,187 (60%)                      | 1,066 (54%)      |
| End of study period (12/2020)                | 800 (44%)                     | 682 (37%)        | 448 (24%)                    | 367 (20%)       | 1,086 (48%)                   | 953 (42%)        | 710 (36%)                        | 812 (41%)        |
| Outcome (stroke)                             | 56 (3.0%)                     | 57 (3.1%)        | 33 (1.8%)                    | 32 (1.7%)       | 65 (2.9%)                     | 68 (3.0%)        | 59 (3.0%)                        | 65 (3.3%)        |
| End of index DOAC                            | -                             | -                | 615 (33%)                    | 562 (31%)       | -                             | -                | -                                | -                |
| Start of DOAC from other comparator group    | -                             | -                | 43 (2.3%)                    | 119 (6.5%)      | -                             | -                | -                                | -                |
| Start of another DOAC (dabigatran, edoxaban) | -                             | -                | 46 (2.5%)                    | 79 (4.3%)       | -                             | -                | -                                | -                |

DOAC = direct oral anticoagulant; ITT = intent-to-treat; AT = as-treated; PS = propensity score.

Apixaban was compared with other DOACs which included rivaroxaban, edoxaban, and dabigatran; rivaroxaban was compared with other DOACs which included apixaban, edoxaban, and dabigatran.
